# Supplementary material for: DFT characterisation of a PdII → IIII adduct, and a PdII complex formed after oxidative alkenylation of PdII by [Ph(alkenyl)IIII]+, in Pd-mediated synthesis of benzofurans involving PdIV, annulation and chain-walking
Source: Royal Society of Chemistry journal article supplement (doi:10.1039/d2dt00759b), 2022-01-01
Supplement: d2dt00759b1.pdf [file d2dt00759b1.pdf]

## Electronic Supporting Information

### DFT characterisation of a Pd<sup>II</sup>→I<sup>III</sup> adduct, and a Pd<sup>II</sup> complex formed after oxidative alkenylation of Pd<sup>II</sup> by [Ph(alkenyl)I<sup>III</sup>]<sup>+</sup>, in Pd-mediated synthesis of benzofurans involving Pd<sup>IV</sup>, annulation and chain-walking

Allan J. Canty,<sup>\*a</sup> Alireza Ariafard<sup>a</sup> and Helena C. Malinakova<sup>b</sup>

<sup>a</sup>School of Natural Sciences – Chemistry, University of Tasmania, Private Bag 75, Hobart, Tasmania 7001, Australia.

<sup>b</sup>Department of Chemistry, University of Kansas, 1251 Wescoe Hall Drive, Lawrence, KS 66045-7582, United States

**Table ESI-1.** Second-generation energy decomposition analysis (EDA) based on absolutely localised orbitals (ALMO-EDA2) for interaction between the iodonium and palladium fragments in adducts **5** and **4**. The energies are given in kcal mol<sup>-1</sup>.

| adduct                   | <b>5</b> | <b>4</b> |
|--------------------------|----------|----------|
| $\Delta E_{\text{int}}$  | -17.2    | -13.1    |
| $\Delta E(\text{PAULI})$ | 29.3     | 22.5     |
| $\Delta E(\text{ELEC})$  | -24.0    | -21.9    |
| $\Delta E(\text{SOL})$   | 8.1      | 8.6      |
| $\Delta E(\text{DISP})$  | -17.2    | -11.3    |
| $\Delta E(\text{POL})$   | -3.4     | -2.3     |
| $\Delta E(\text{CT})$    | -10.0    | -8.7     |

The following formula expresses the interaction energy ( $\Delta E_{\text{int}}$ ) between the iodonium and palladium fragments. Here,  $\Delta E(\text{PAULI})$  is the Pauli repulsion,  $\Delta E(\text{ELEC})$  is the electrostatic interactions,  $\Delta E(\text{SOL})$  is the solvation energy,  $\Delta E_{\text{disp}}$  is the dispersion interaction,  $\Delta E(\text{POL})$  is polarization energy and  $\Delta E(\text{CT})$  is charge transfer energy.

$$\Delta E_{\text{int}} = \Delta E(\text{PAULI}) + \Delta E(\text{ELEC}) + \Delta E(\text{SOL}) + \Delta E(\text{DISP}) + \Delta E(\text{POL}) + \Delta E(\text{CT})$$

The EDA calculations indicate that orbital, dispersive, and electrostatic interactions all contribute to the stability of these adducts (Table ESI-1). The calculations indicate that the primary contribution of orbital interactions to the stability of these adducts comes from charge transfer from the Pd  $d_{z^2}$  orbital to the LUMO of the iodonium reagent. This claim is supported by the contour plots of natural orbitals for chemical bonds (NOCV) for this specific interaction in structures **5** and **4** (Figure ESI-1).

**Figure ESI-1** Contour plots of NOCV for charge transfer from the Pd  $d_{z^2}$  orbital to the LUMO of the iodonium reagent in adducts **5** (left) and **4** (right).

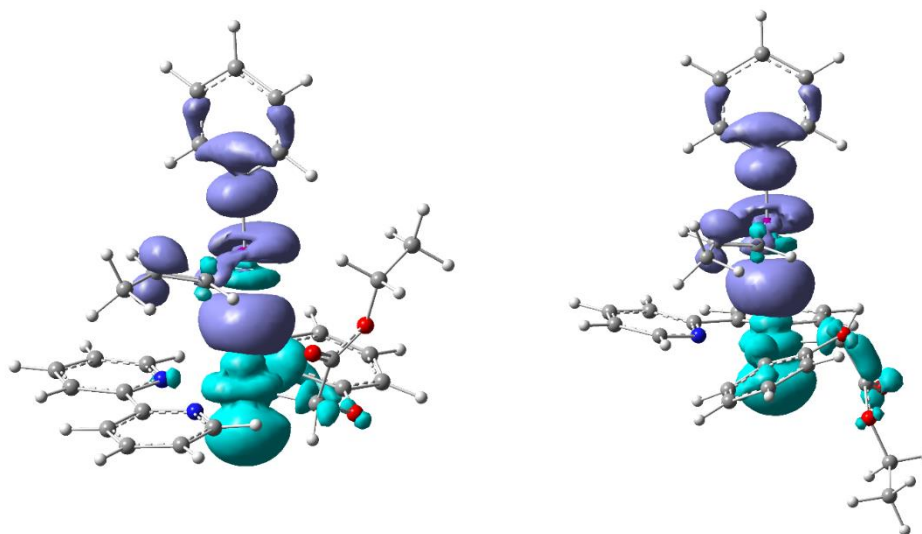

**Figure ESI-2.** Potential energy scans for those steps in the sequence **18** → **22** for which transition states could not be identified, illustrating inflection points (**18** → **19**, **20** → **21**) and a “barrierless” process for **19** → **20**.

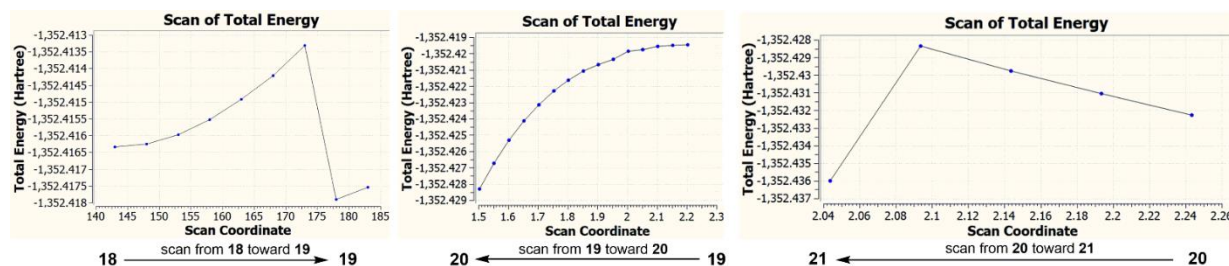

**Figure ESI-3.** Chain-walking from **17** (Fig. 3a) to **B** containing the benzofuran skeleton in the isomeric form corresponding to the high energy isomer **26** (Scheme 2). Selected interatomic distances (Å) are shown; energies  $\Delta G$  ( $\Delta H$ ) are in kcal mol<sup>-1</sup>.

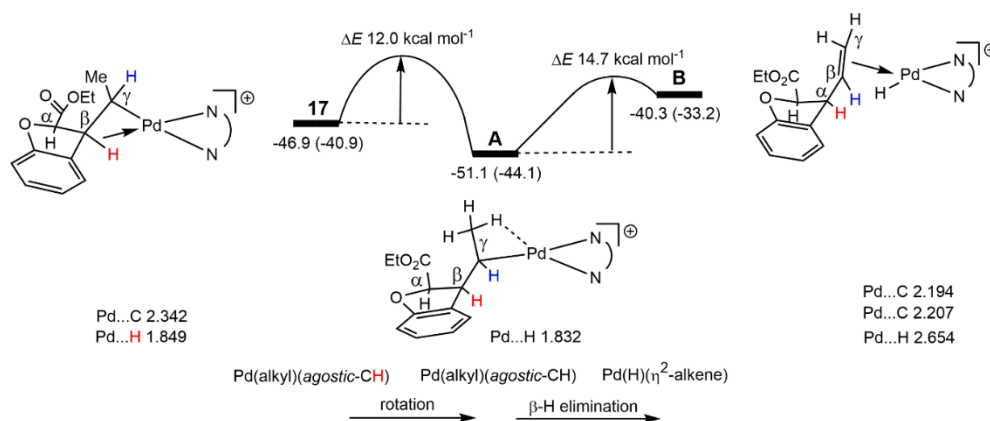

## Energy parameters and coordinates for calculated species.

All calculations related to thermodynamic effects are obtained using M06/BS1; single-point data, listed immediately after BS1 data, are calculated using BS2 and M06-D3, and are followed by Cartesian coordinates.

1

E(RM06) = -1235.34617903  
Zero-point correction= 0.342643 (Hartree/Particle)  
Thermal correction to Energy= 0.365411  
Thermal correction to Enthalpy= 0.366355  
Thermal correction to Gibbs Free Energy= 0.289432  
Sum of electronic and zero-point Energies= -1235.003536  
Sum of electronic and thermal Energies= -1234.980768  
Sum of electronic and thermal Enthalpies= -1234.979824  
Sum of electronic and thermal Free Energies= -1235.056747  
E(RM06L) = -1236.48566061

C -3.42168 -3.14911 0.04711  
C -2.09052 -1.35771 0.6627  
C -3.2198 -0.59223 0.94864  
C -4.48202 -1.13881 0.76295  
C -4.58904 -2.44676 0.31198  
H -3.45775 -4.18144 -0.29327  
H -3.12123 0.41874 1.33334  
H -5.36976 -0.55071 0.98534  
H -5.55378 -2.92636 0.16994  
C -0.72049 -0.86111 0.90801  
C -0.45814 0.46122 1.2616  
C 1.52718 -1.39195 1.08891  
C 0.84514 0.84732 1.5428  
H -1.26096 1.1911 1.31318  
C 1.8584 -0.09807 1.46823  
H 2.29345 -2.15573 0.9858  
H 1.06147 1.87708 1.81889  
H 2.89336 0.15304 1.68648  
Pd -0.3087 -3.69268 -0.07519  
N 0.27578 -1.76887 0.80541  
N -2.20307 -2.62167 0.19684  
C -0.82972 -5.43368 -0.94701  
C -1.95421 -5.74224 -1.71307  
C 0.13298 -6.44997 -0.79059  
C -2.16353 -7.03071 -2.21947  
H -2.69431 -4.97075 -1.93416  
C -0.05378 -7.73877 -1.27984  
C -1.2209 -8.0273 -1.9857  
H -3.06232 -7.24895 -2.79573  
H 0.7199 -8.49099 -1.12934  
H -1.37843 -9.0329 -2.3747  
C 1.47489 -4.72723 -0.10859  
H 2.02471 -4.48515 0.81068  
O 1.27478 -6.13587 -0.13516  
C 2.2275 -4.29329 -1.31957  
O 2.30244 -4.89428 -2.37128

O 2.82388 -3.10084 -1.11232  
C 3.49464 -2.51601 -2.23595  
H 4.34474 -3.15323 -2.51579  
H 2.8058 -2.48779 -3.09062  
C 3.93608 -1.13703 -1.82521  
H 4.48457 -0.65666 -2.64446  
H 3.07143 -0.50781 -1.57616  
H 4.59677 -1.1802 -0.94911

## 2

E(RM06) = -784.313728431  
Zero-point correction= 0.175520 (Hartree/Particle)  
Thermal correction to Energy= 0.192448  
Thermal correction to Enthalpy= 0.193392  
Thermal correction to Gibbs Free Energy= 0.127382  
Sum of electronic and zero-point Energies= -784.138208  
Sum of electronic and thermal Energies= -784.121281  
Sum of electronic and thermal Enthalpies= -784.120337  
Sum of electronic and thermal Free Energies= -784.186346  
E(RM06L) = -1071.44761232

C 0.33179 -3.9629 3.17576  
C 1.64403 -4.03349 2.96775  
H -0.19494 -3.20023 3.747  
H 2.05916 -4.84487 2.36606  
C 2.59862 -3.0382 3.52436  
H 3.35123 -3.53999 4.14734  
H 3.14267 -2.54138 2.70947  
H 2.09195 -2.27492 4.12559  
C -1.38369 -6.4498 4.11499  
C -0.33737 -6.68095 4.99199  
C -0.6246 -7.37417 6.16624  
C -1.92004 -7.81589 6.42098  
C -2.94157 -7.56824 5.50864  
C -2.68564 -6.87175 4.32828  
H 0.6722 -6.33219 4.78196  
H 0.17515 -7.57057 6.87792  
H -2.13478 -8.359 7.33941  
H -3.95381 -7.91396 5.70991  
H -3.47324 -6.67301 3.6039  
I -0.96851 -5.37383 2.28869  
F -3.50142 -5.6695 -0.06321  
F -4.68451 -7.62007 0.09434  
F -4.64025 -6.16095 1.85387  
F -2.76538 -7.34082 1.30258

## 3

E(RM06) = -1235.34609123  
Zero-point correction= 0.342072 (Hartree/Particle)  
Thermal correction to Energy= 0.365107  
Thermal correction to Enthalpy= 0.366051  
Thermal correction to Gibbs Free Energy= 0.287458  
Sum of electronic and zero-point Energies= -1235.004019  
Sum of electronic and thermal Energies= -1234.980984  
Sum of electronic and thermal Enthalpies= -1234.980040  
Sum of electronic and thermal Free Energies= -1235.058634

E(RM06L) = -1236.48567819

C -3.39445 -3.34621 -0.19973  
C -2.61627 -1.283 0.50853  
C -3.91979 -0.79108 0.56421  
C -4.97946 -1.61734 0.21731  
C -4.71636 -2.92597 -0.16193  
H -3.14319 -4.36716 -0.4776  
H -4.11643 0.22604 0.89073  
H -5.99984 -1.24271 0.25931  
H -5.51276 -3.61792 -0.42217  
C -1.4492 -0.48004 0.93064  
C -1.55319 0.86448 1.28188  
C 0.82273 -0.4612 1.39812  
C -0.42399 1.54758 1.71224  
H -2.50489 1.38371 1.21926  
C 0.78711 0.87406 1.77737  
H 1.75636 -1.01981 1.38587  
H -0.49488 2.59702 1.99009  
H 1.69774 1.36716 2.10712  
Pd -0.26476 -3.16883 0.2053  
N -0.26285 -1.12557 0.98599  
N -2.36591 -2.54874 0.10386  
C -0.24293 -5.01455 -0.59906  
C -1.12012 -5.58772 -1.52053  
C 0.87113 -5.78623 -0.21619  
C -0.95333 -6.90283 -1.97099  
H -1.95549 -5.00607 -1.91522  
C 1.05693 -7.0965 -0.64585  
C 0.12439 -7.65717 -1.51778  
H -1.66587 -7.33063 -2.67581  
H 1.93465 -7.65292 -0.31839  
H 0.25927 -8.68237 -1.86151  
C 1.66492 -3.78763 0.59347  
H 1.92036 -3.43107 1.60009  
O 1.78933 -5.2074 0.59126  
C 2.55601 -3.1256 -0.39686  
O 2.94485 -1.97267 -0.29096  
O 2.87239 -3.90648 -1.43703  
C 3.6721 -3.30244 -2.46381  
H 3.13031 -2.43982 -2.87502  
H 4.60358 -2.92807 -2.01879  
C 3.92985 -4.35418 -3.50819  
H 4.53489 -3.93547 -4.32154  
H 4.47159 -5.2069 -3.0802  
H 2.98801 -4.72301 -3.93347

#### 4

E(RM06) = -1595.19530082

Zero-point correction= 0.503373 (Hartree/Particle)

Thermal correction to Energy= 0.539016

Thermal correction to Enthalpy= 0.539960

Thermal correction to Gibbs Free Energy= 0.429621

Sum of electronic and zero-point Energies= -1594.691928

Sum of electronic and thermal Energies= -1594.656285

Sum of electronic and thermal Enthalpies= -1594.655341

Sum of electronic and thermal Free Energies= -1594.765680  
E(RM06L) = -1883.20521223

C -3.49146 -2.81 0.34918  
C -2.26792 -0.84559 0.4712  
C -3.39826 -0.14712 0.89332  
C -4.60524 -0.81792 1.03484  
C -4.65522 -2.17887 0.7661  
H -3.48239 -3.87811 0.13921  
H -3.33984 0.91169 1.12823  
H -5.49228 -0.28131 1.36424  
H -5.57293 -2.75041 0.87602  
C -0.93905 -0.20558 0.36549  
C -0.75815 1.17159 0.47946  
C 1.3463 -0.51992 0.10435  
C 0.52515 1.6983 0.41462  
H -1.60811 1.83629 0.60604  
C 1.59966 0.83971 0.22913  
H 2.14849 -1.22847 -0.09519  
H 0.67851 2.77165 0.5026  
H 2.6203 1.20783 0.16822  
Pd -0.39646 -3.13133 -0.20739  
N 0.11266 -1.03296 0.17236  
N -2.33094 -2.16645 0.18694  
C -0.86296 -5.03659 -0.66414  
C -2.04489 -5.54694 -1.19872  
C 0.19026 -5.94429 -0.45223  
C -2.20787 -6.91987 -1.42363  
H -2.86361 -4.87408 -1.46055  
C 0.05034 -7.31263 -0.65594  
C -1.16795 -7.79764 -1.13302  
H -3.14733 -7.29657 -1.82685  
H 0.89388 -7.9774 -0.47251  
H -1.29046 -8.86685 -1.3023  
C 1.45745 -4.03906 -0.27342  
H 2.07698 -3.59732 0.51868  
O 1.37464 -5.43968 -0.02613  
C 2.05894 -3.70212 -1.59466  
O 2.59478 -2.63055 -1.82903  
O 1.92761 -4.66987 -2.50515  
C 2.41418 -4.37577 -3.82511  
H 1.89012 -3.48852 -4.20481  
C -0.75984 -5.35326 2.72659  
C -2.00564 -5.75461 2.94764  
H 0.07624 -5.93097 2.33681  
H -2.75524 -5.05484 3.3249  
C -2.43416 -7.15575 2.68195  
H -2.73708 -7.64839 3.61602  
H -3.30977 -7.16002 2.01915  
H -1.63428 -7.74235 2.21441  
H 3.48309 -4.13234 -3.7644  
C -0.05052 -3.51757 5.222  
C -1.20288 -3.35813 5.98139  
C -1.09906 -3.50187 7.36308  
C 0.1309 -3.79253 7.94745  
C 1.26968 -3.94283 7.16102

C 1.18963 -3.8057 5.77675  
H -2.15931 -3.12552 5.5167  
H -1.9868 -3.38291 7.98146  
H 0.20284 -3.9019 9.02782  
H 2.22945 -4.1698 7.6214  
H 2.07322 -3.92319 5.15235  
I -0.19592 -3.31974 3.07829  
C 2.15782 -5.5895 -4.67556  
H 2.50815 -5.41068 -5.69926  
H 2.68662 -6.46519 -4.27908  
H 1.08594 -5.82138 -4.71342

## 5

E(RM06) = -1595.19986166  
Zero-point correction= 0.503588 (Hartree/Particle)  
Thermal correction to Energy= 0.538784  
Thermal correction to Enthalpy= 0.539728  
Thermal correction to Gibbs Free Energy= 0.433208  
Sum of electronic and zero-point Energies= -1594.696274  
Sum of electronic and thermal Energies= -1594.661078  
Sum of electronic and thermal Enthalpies= -1594.660134  
Sum of electronic and thermal Free Energies= -1594.766654  
E(RM06L) = -1883.21063062

C -2.53598 2.31692 -2.10345  
C -1.07223 3.10321 -0.49191  
C -0.85589 4.26481 -1.23246  
C -1.51016 4.43924 -2.44397  
C -2.38035 3.45289 -2.88566  
H -3.21941 1.52809 -2.40648  
H -0.18445 5.03826 -0.87092  
H -1.34672 5.34282 -3.02705  
H -2.93334 3.55048 -3.81597  
C -0.43236 2.8786 0.8217  
C 0.36162 3.84404 1.43961  
C -0.07676 1.41415 2.58283  
C 0.94769 3.56569 2.66688  
H 0.52377 4.81258 0.9757  
C 0.73321 2.32444 3.24863  
H -0.25161 0.41995 2.98741  
H 1.56688 4.31348 3.15746  
H 1.17692 2.05598 4.20364  
Pd -2.01891 0.33693 0.34285  
N -0.65288 1.68075 1.40523  
N -1.88863 2.12616 -0.94994  
C -3.35762 -0.91765 -0.52409  
C -3.80905 -0.98977 -1.84355  
C -3.86877 -1.88092 0.36822  
C -4.78057 -1.91463 -2.24194  
H -3.3998 -0.32259 -2.60413  
C -4.83486 -2.81151 -0.00237  
C -5.30024 -2.81358 -1.31518  
H -5.1272 -1.92703 -3.27472  
H -5.19634 -3.53207 0.73032  
H -6.05797 -3.53585 -1.6164  
C -2.17937 -1.16287 1.74842

H -2.18004 -0.6644 2.72663  
O -3.38974 -1.8928 1.63368  
C -0.96322 -2.01291 1.62477  
O 0.13753 -1.68373 2.04364  
O -1.18054 -3.16054 0.97434  
C -0.0357 -3.99572 0.74852  
H 0.75412 -3.39517 0.27204  
C 1.24967 -0.05392 -0.72256  
C 1.83046 1.02813 -1.2281  
H 1.34919 -0.48474 0.27503  
H 1.60649 1.34485 -2.25065  
C 2.79181 1.85603 -0.44908  
H 3.777 1.85586 -0.93491  
H 2.44966 2.90054 -0.42104  
H 2.90628 1.49192 0.57897  
H 0.35115 -4.34033 1.71671  
C 1.38978 -2.04399 -3.18906  
C 1.66529 -1.43028 -4.40415  
C 2.64829 -1.99572 -5.2139  
C 3.32368 -3.14078 -4.80056  
C 3.02592 -3.73442 -3.57679  
C 2.04486 -3.18802 -2.75271  
H 1.13099 -0.53592 -4.71946  
H 2.88289 -1.53475 -6.17157  
H 4.08927 -3.57629 -5.43973  
H 3.55591 -4.62964 -3.25707  
H 1.80397 -3.64692 -1.79447  
I -0.1219 -1.18014 -1.91875  
C -0.4791 -5.13695 -0.12521  
H 0.36499 -5.80834 -0.3253  
H -1.27216 -5.71834 0.36073  
H -0.8648 -4.7695 -1.08619

## 6

E(RM06) = -1595.19735445  
Zero-point correction= 0.503553 (Hartree/Particle)  
Thermal correction to Energy= 0.538669  
Thermal correction to Enthalpy= 0.539613  
Thermal correction to Gibbs Free Energy= 0.433679  
Sum of electronic and zero-point Energies= -1594.693801  
Sum of electronic and thermal Energies= -1594.658685  
Sum of electronic and thermal Enthalpies= -1594.657741  
Sum of electronic and thermal Free Energies= -1594.763675  
E(RM06L) = -1883.20626186

C 3.21833 1.88618 -1.49332  
C 3.6788 -0.35259 -1.12132  
C 4.65175 -0.33761 -2.11999  
C 4.89697 0.83614 -2.81921  
C 4.17575 1.97619 -2.49416  
H 2.64213 2.75922 -1.19502  
H 5.23399 -1.22745 -2.34177  
H 5.65692 0.85915 -3.59728  
H 4.34784 2.92475 -2.99572  
C 3.4137 -1.54936 -0.29607  
C 3.97389 -2.79261 -0.58488



C 2.36708 -2.41838 1.5797  
C 3.7111 -3.87088 0.24864  
H 4.60373 -2.92866 -1.45938  
C 2.90072 -3.68114 1.35951  
H 1.71099 -2.23026 2.42547  
H 4.1398 -4.8466 0.0305  
H 2.67395 -4.49164 2.0475  
Pd 1.55172 0.55193 0.8405  
N 2.60172 -1.37825 0.77148  
N 2.95403 0.75244 -0.83601  
C 0.52673 2.27802 0.80993  
C 0.25238 3.11505 -0.27407  
C -0.06821 2.60576 2.0439  
C -0.52234 4.27346 -0.1252  
H 0.63984 2.86983 -1.26657  
C -0.84325 3.74785 2.2144  
C -1.05687 4.58831 1.12065  
H -0.70055 4.92439 -0.98071  
H -1.2869 3.96016 3.1864  
H -1.65831 5.48791 1.24614  
C 0.45951 0.45381 2.59987  
H 1.10907 -0.02721 3.34391  
O 0.13215 1.75597 3.07754  
C -0.79593 -0.32654 2.40993  
O -1.92339 0.12575 2.38706  
O -0.53606 -1.63973 2.23618  
C -1.66358 -2.49668 2.00018  
H -2.32736 -2.46468 2.87476  
C -0.71011 -0.67591 -1.17978  
C -0.18833 -0.99658 -2.35908  
H -0.50204 -1.1397 -0.21433  
H -0.46605 -0.44184 -3.25778  
C 0.78787 -2.11063 -2.51078  
H 0.40458 -2.85606 -3.22081  
H 1.73396 -1.73293 -2.92515  
H 0.99465 -2.60954 -1.55469  
H -2.23074 -2.11495 1.1378  
C -3.82361 -0.41559 -1.08504  
C -4.25253 -0.89426 -2.31556  
C -5.33904 -1.76536 -2.32809  
C -5.96162 -2.12752 -1.13567  
C -5.50496 -1.63031 0.08166  
C -4.41749 -0.75908 0.12185  
H -3.7576 -0.60178 -3.2401  
H -5.69916 -2.15751 -3.27724  
H -6.81195 -2.80649 -1.1564  
H -5.99185 -1.91949 1.0111  
H -4.03197 -0.3779 1.06718  
I -2.13626 0.90842 -1.01801  
C -1.12774 -3.87794 1.74074  
H -1.9559 -4.57699 1.57378  
H -0.48756 -3.88848 0.8476  
H -0.53955 -4.24055 2.59371

**7**

E(RM06) = -1595.16273430

Zero-point correction= 0.501387 (Hartree/Particle)  
Thermal correction to Energy= 0.536715  
Thermal correction to Enthalpy= 0.537659  
Thermal correction to Gibbs Free Energy= 0.428754  
Sum of electronic and zero-point Energies= -1594.661347  
Sum of electronic and thermal Energies= -1594.626019  
Sum of electronic and thermal Enthalpies= -1594.625075  
Sum of electronic and thermal Free Energies= -1594.733981  
E(RM06L) = -1883.21888192

C -1.81729 2.59515 2.46728  
C -0.40971 3.32338 0.77754  
C -0.1088 4.47432 1.50301  
C -0.69755 4.67744 2.74342  
C -1.57412 3.72252 3.23811  
H -2.46801 1.80755 2.83553  
H 0.59091 5.20701 1.11281  
H -0.46455 5.57137 3.31742  
H -2.05669 3.83263 4.20528  
C 0.19106 3.05011 -0.54485  
C 0.99228 3.97837 -1.20673  
C 0.39525 1.56477 -2.31481  
C 1.5043 3.66851 -2.4601  
H 1.20685 4.94577 -0.76233  
C 1.19609 2.44255 -3.03267  
H 0.12098 0.59884 -2.73086  
H 2.1283 4.38774 -2.98587  
H 1.56188 2.16039 -4.01639  
Pd -1.32007 0.46803 0.1147  
N -0.08845 1.85351 -1.10303  
N -1.25998 2.39474 1.26994  
C -2.474 -0.86092 1.11593  
C -3.39805 -0.60341 2.12333  
C -2.35044 -2.17596 0.64121  
C -4.14021 -1.65025 2.67295  
H -3.57023 0.40688 2.48871  
C -3.07741 -3.22882 1.17925  
C -3.9664 -2.95472 2.2134  
H -4.85488 -1.44122 3.46699  
H -2.95914 -4.23157 0.77289  
H -4.54569 -3.76598 2.65055  
C -1.30923 -1.20387 -1.10968  
H -0.34137 -1.23757 -1.62466  
O -1.48503 -2.38038 -0.39025  
C -2.42002 -0.86931 -2.07418  
O -2.35435 0.09604 -2.81266  
O -3.43992 -1.70832 -2.00936  
C -4.57754 -1.41699 -2.8536  
H -4.91938 -0.39815 -2.63208  
C 0.17079 -0.42538 1.16804  
C 0.83428 0.20274 2.12745  
H 0.35413 -1.44809 0.83011  
H 0.57003 1.21056 2.45015  
C 2.00689 -0.42905 2.81461  
H 2.91268 0.17367 2.65688  
H 1.83226 -0.47514 3.89839

H 2.19873 -1.44529 2.44789  
H -4.24865 -1.44653 -3.89978  
C 3.82167 -1.72439 0.0666  
C 4.90494 -1.67656 0.9371  
C 5.16507 -2.78113 1.74589  
C 4.35209 -3.90956 1.68077  
C 3.27497 -3.94055 0.79922  
C 3.00131 -2.84477 -0.01784  
H 5.53459 -0.79039 0.99348  
H 6.0102 -2.75302 2.43184  
H 4.56039 -4.76846 2.31611  
H 2.63946 -4.8227 0.73943  
H 2.16111 -2.87227 -0.71019  
I 3.37638 -0.01728 -1.14454  
C -5.62549 -2.45059 -2.5514  
H -6.51456 -2.26734 -3.16617  
H -5.25739 -3.45999 -2.77181  
H -5.92205 -2.41075 -1.4957

## 8

E(RM06) = -1352.35472709  
Zero-point correction= 0.413005 (Hartree/Particle)  
Thermal correction to Energy= 0.440657  
Thermal correction to Enthalpy= 0.441601  
Thermal correction to Gibbs Free Energy= 0.353815  
Sum of electronic and zero-point Energies= -1351.941722  
Sum of electronic and thermal Energies= -1351.914070  
Sum of electronic and thermal Enthalpies= -1351.913126  
Sum of electronic and thermal Free Energies= -1352.000912  
E(RM06L) = -1353.63364523

C -1.7697 -2.37673 -1.24067  
C -2.80953 -0.30787 -1.07967  
C -3.89798 -0.77765 -1.81178  
C -3.89775 -2.08873 -2.26955  
C -2.82481 -2.91445 -1.96377  
H -0.91566 -2.98957 -0.95845  
H -4.753 -0.1381 -2.0118  
H -4.74249 -2.46491 -2.84217  
H -2.79707 -3.95556 -2.27295  
C -2.78862 1.03393 -0.45693  
C -3.79679 1.97333 -0.65705  
C -1.72925 2.44274 1.05596  
C -3.75468 3.17526 0.03764  
H -4.6121 1.77548 -1.34635  
C -2.7135 3.41196 0.92431  
H -0.8867 2.59214 1.72773  
H -4.5369 3.91635 -0.11031  
H -2.65142 4.33073 1.50073  
Pd -0.06223 -0.11204 0.23598  
N -1.75923 1.29204 0.37889  
N -1.74555 -1.10461 -0.83531  
C 1.55763 -1.28174 -0.02947  
C 1.71365 -2.31159 -0.95177  
C 2.66029 -0.90014 0.7493  
C 2.93622 -2.97922 -1.0454

H 0.8992 -2.60127 -1.61351  
C 3.88105 -1.55598 0.66996  
C 4.00418 -2.6114 -0.22825  
H 3.05017 -3.79161 -1.76099  
H 4.71585 -1.22263 1.28365  
H 4.95326 -3.13861 -0.30643  
C 1.45752 0.97609 1.13021  
H 1.03666 1.53018 1.97695  
O 2.48598 0.15769 1.58807  
C 1.83612 1.91497 0.01075  
O 1.04861 2.72465 -0.44145  
O 3.07838 1.74723 -0.41368  
C 3.5011 2.57552 -1.52089  
H 2.80802 2.41588 -2.35657  
C -0.2633 -1.01999 2.03125  
C -1.45031 -1.46934 2.41065  
H 0.6593 -1.0557 2.61327  
H -2.32131 -1.3982 1.75604  
C -1.6669 -2.09403 3.75536  
H -2.42914 -1.53849 4.31815  
H -2.0334 -3.12359 3.6442  
H -0.74467 -2.11639 4.34785  
H 3.42809 3.62638 -1.21421  
C 4.90847 2.17336 -1.86048  
H 5.27098 2.77171 -2.70463  
H 5.58062 2.33692 -1.00936  
H 4.95554 1.11414 -2.14292

## 9

E(RM06) = -1352.35090350  
Zero-point correction= 0.413400 (Hartree/Particle)  
Thermal correction to Energy= 0.440854  
Thermal correction to Enthalpy= 0.441799  
Thermal correction to Gibbs Free Energy= 0.354723  
Sum of electronic and zero-point Energies= -1351.937504  
Sum of electronic and thermal Energies= -1351.910049  
Sum of electronic and thermal Enthalpies= -1351.909105  
Sum of electronic and thermal Free Energies= -1351.996180  
E(RM06L) = -1353.63155759

C -3.10814 3.01659 -1.38495  
C -1.52233 3.69449 0.17008  
C -1.61502 5.00851 -0.28354  
C -2.48073 5.31305 -1.3255  
C -3.2496 4.30256 -1.88543  
H -3.69935 2.19375 -1.78168  
H -1.03092 5.79879 0.17927  
H -2.55947 6.33634 -1.68542  
H -3.95239 4.49681 -2.69081  
C -0.65338 3.30621 1.30054  
C 0.24319 4.19011 1.89484  
C -0.01166 1.61951 2.76684  
C 1.01793 3.76018 2.96429  
H 0.35002 5.20523 1.52481  
C 0.89099 2.45299 3.41232  
H -0.11468 0.57388 3.05388

H 1.7208 4.44369 3.43513  
H 1.48278 2.0719 4.23993  
Pd -2.06692 0.71941 0.53939  
N -0.77023 2.03654 1.74701  
N -2.25931 2.71429 -0.39827  
C -3.24369 -0.50997 -0.55228  
C -3.61471 -0.41305 -1.88686  
C -3.74576 -1.56894 0.21395  
C -4.54977 -1.30519 -2.41871  
H -3.19152 0.3548 -2.5348  
C -4.67187 -2.46713 -0.29985  
C -5.07837 -2.31849 -1.62315  
H -4.85814 -1.20556 -3.45792  
H -5.04241 -3.27662 0.32667  
H -5.80088 -3.01724 -2.04136  
C -2.11096 -0.99973 1.71858  
H -2.13147 -0.56216 2.72639  
O -3.31212 -1.68466 1.49563  
C -0.88894 -1.84578 1.5533  
O 0.16511 -1.5759 2.10053  
O -1.06777 -2.85762 0.71795  
C 0.10108 -3.64304 0.39693  
H 0.86185 -2.96977 -0.02188  
C -0.4367 0.15242 -0.50961  
C -0.28412 0.37258 -1.80322  
H 0.30683 -0.24491 0.18716  
H -1.09221 0.78173 -2.41233  
C 1.00756 0.07187 -2.50157  
H 0.84326 -0.65921 -3.30467  
H 1.41543 0.97951 -2.96618  
H 1.75762 -0.33369 -1.81175  
H 0.50006 -4.07213 1.32442  
C -0.32709 -4.69671 -0.58482  
H 0.53418 -5.31561 -0.86276  
H -1.09413 -5.34979 -0.15109  
H -0.73293 -4.24069 -1.49651

## 10

E(RM06) = -1595.20928587  
Zero-point correction= 0.504440 (Hartree/Particle)  
Thermal correction to Energy= 0.539533  
Thermal correction to Enthalpy= 0.540477  
Thermal correction to Gibbs Free Energy= 0.434402  
Sum of electronic and zero-point Energies= -1594.704846  
Sum of electronic and thermal Energies= -1594.669753  
Sum of electronic and thermal Enthalpies= -1594.668809  
Sum of electronic and thermal Free Energies= -1594.774884  
E(RM06L) = -1883.21819556

C -2.97151 2.94471 -1.34256  
C -1.34999 3.50395 0.2226  
C -1.40262 4.83771 -0.17508  
C -2.26758 5.21495 -1.19363  
C -3.07654 4.25538 -1.78528  
H -3.59466 2.16063 -1.76672  
H -0.78777 5.58708 0.3141

H -2.31568 6.25462 -1.50907  
H -3.78191 4.50662 -2.57235  
C -0.49779 3.04524 1.33994  
C 0.42393 3.87801 1.97087  
C 0.04689 1.30332 2.77681  
C 1.16431 3.391 3.04  
H 0.57631 4.89865 1.63222  
C 0.97112 2.08206 3.4585  
H -0.11398 0.26345 3.05333  
H 1.88753 4.03333 3.53728  
H 1.52684 1.65801 4.2906  
Pd -1.95349 0.52172 0.43057  
N -0.66874 1.76836 1.74702  
N -2.12301 2.5732 -0.37959  
C -3.13609 -0.61636 -0.7484  
C -3.52315 -0.40314 -2.06393  
C -3.64797 -1.72471 -0.0613  
C -4.48071 -1.23346 -2.65374  
H -3.09179 0.40489 -2.65553  
C -4.59388 -2.5645 -0.63478  
C -5.01389 -2.30235 -1.93655  
H -4.8017 -1.04266 -3.67648  
H -4.97221 -3.41516 -0.07083  
H -5.75531 -2.95165 -2.39923  
C -2.00538 -1.28832 1.47124  
H -2.00755 -0.94572 2.51533  
O -3.2184 -1.93472 1.20964  
C -0.83741 -2.17918 1.17196  
O -0.8586 -3.12386 0.41757  
O 0.24396 -1.75826 1.8393  
C 1.49598 -2.40863 1.53252  
H 1.43738 -3.45373 1.86159  
C -0.29585 0.05374 -0.62076  
C -0.13778 0.26644 -1.91474  
H 0.468 -0.26134 0.09415  
H -0.96395 0.59637 -2.5469  
C 1.19146 0.07488 -2.58057  
H 1.10986 -0.66758 -3.38781  
H 1.53105 1.01632 -3.03346  
H 1.95736 -0.26802 -1.87296  
H 1.63144 -2.3988 0.44171  
C 0.72991 -3.38138 -3.40023  
C 1.48423 -3.24337 -4.56112  
C 2.87378 -3.30501 -4.47129  
C 3.49158 -3.5061 -3.23998  
C 2.71851 -3.65198 -2.09113  
C 1.32743 -3.58759 -2.161  
H 1.00018 -3.08145 -5.5227  
H 3.4727 -3.19478 -5.3741  
H 4.57732 -3.55312 -3.17687  
H 3.19761 -3.81708 -1.12613  
H 0.71979 -3.68629 -1.26062  
I -1.39749 -3.19655 -3.50051  
C 2.57938 -1.63996 2.23604  
H 3.54962 -2.11898 2.05849  
H 2.63551 -0.60851 1.86204  
H 2.40466 -1.61072 3.31912

**11**

E(RM06) = -1352.35047437  
Zero-point correction= 0.413136 (Hartree/Particle)  
Thermal correction to Energy= 0.440609  
Thermal correction to Enthalpy= 0.441554  
Thermal correction to Gibbs Free Energy= 0.354336  
Sum of electronic and zero-point Energies= -1351.937338  
Sum of electronic and thermal Energies= -1351.909865  
Sum of electronic and thermal Enthalpies= -1351.908921  
Sum of electronic and thermal Free Energies= -1351.996139  
E(RM06L) = -1353.63083995

C -2.96186 2.94827 -1.35873  
C -1.38075 3.53344 0.23864  
C -1.47153 4.8717 -0.13682  
C -2.33474 5.23747 -1.16116  
C -3.10064 4.26178 -1.78335  
H -3.55005 2.14999 -1.80678  
H -0.88811 5.63251 0.37318  
H -2.41341 6.28045 -1.45931  
H -3.79942 4.50331 -2.57931  
C -0.5143 3.07885 1.34668  
C 0.40784 3.91654 1.97006  
C 0.08704 1.3247 2.74621  
C 1.17911 3.42513 3.01513  
H 0.53829 4.94315 1.64059  
C 1.01765 2.10616 3.41588  
H -0.05351 0.27809 3.00952  
H 1.90401 4.07083 3.50555  
H 1.60162 1.67746 4.22592  
Pd -1.95102 0.54382 0.44022  
N -0.66121 1.79581 1.74262  
N -2.11857 2.58947 -0.38633  
C -3.11243 -0.61413 -0.74346  
C -3.44833 -0.44435 -2.07938  
C -3.65566 -1.69555 -0.03872  
C -4.39105 -1.28833 -2.67313  
H -2.99876 0.34851 -2.67736  
C -4.58953 -2.54585 -0.61482  
C -4.96062 -2.32514 -1.93874  
H -4.67439 -1.13126 -3.71235  
H -4.99343 -3.37504 -0.03674  
H -5.68895 -2.98573 -2.40593  
C -2.02803 -1.25555 1.50055  
H -2.01049 -0.90727 2.54228  
O -3.2617 -1.86618 1.25117  
C -0.89129 -2.18429 1.19491  
O -0.94731 -3.12883 0.44363  
O 0.20849 -1.79697 1.85324  
C 1.43319 -2.50003 1.549  
H 1.36975 -3.50669 1.98076  
C -0.29404 0.06077 -0.59829  
C -0.10404 0.33225 -1.87695  
H 0.44311 -0.33028 0.10617  
H -0.89889 0.74364 -2.50139

C 1.22053 0.08773 -2.53451  
H 1.10642 -0.6179 -3.36827  
H 1.62329 1.02141 -2.94942  
H 1.95303 -0.32553 -1.82955  
H 1.51513 -2.60351 0.45843  
C 2.56054 -1.69327 2.13056  
H 3.51543 -2.19891 1.94478  
H 2.60731 -0.69561 1.67237  
H 2.44199 -1.57271 3.21503

## 12

E(RM06) = -1352.41508230  
Zero-point correction= 0.414762 (Hartree/Particle)  
Thermal correction to Energy= 0.442218  
Thermal correction to Enthalpy= 0.443162  
Thermal correction to Gibbs Free Energy= 0.355181  
Sum of electronic and zero-point Energies= -1352.000320  
Sum of electronic and thermal Energies= -1351.972865  
Sum of electronic and thermal Enthalpies= -1351.971921  
Sum of electronic and thermal Free Energies= -1352.059901  
E(RM06L) = -1353.68016492

C 2.05339 1.27378 -2.0439  
C 2.88732 -0.42682 -0.70778  
C 4.15483 -0.26975 -1.26248  
C 4.35876 0.70176 -2.23337  
C 3.29092 1.49138 -2.63386  
H 1.18434 1.86234 -2.33  
H 4.98113 -0.90339 -0.95377  
H 5.34447 0.83191 -2.67435  
H 3.40105 2.26032 -3.39347  
C 2.58789 -1.44429 0.31581  
C 3.57284 -2.24038 0.89221  
C 0.94898 -2.51822 1.57568  
C 3.22071 -3.19958 1.83175  
H 4.61544 -2.10926 0.61887  
C 1.88517 -3.34982 2.17288  
H -0.11054 -2.61812 1.80084  
H 3.98671 -3.82232 2.28778  
H 1.55779 -4.09362 2.89377  
Pd -0.03078 -0.12407 -0.08966  
N 1.2883 -1.58535 0.67649  
N 1.85194 0.346 -1.10605  
C -1.08829 2.55221 0.53779  
C -0.60842 3.49985 -0.36809  
C -1.70728 1.39091 -0.01777  
C -0.72063 3.31976 -1.74748  
H -0.1712 4.42283 0.00904  
C -1.77864 1.18899 -1.41283  
C -1.2807 2.16441 -2.27869  
H -0.36054 4.10186 -2.41396  
H -2.33952 0.33143 -1.78143  
H -1.36613 2.02959 -3.35478  
C -1.70107 -0.58874 0.98614  
H -1.3918 -0.7097 2.03381  
O -2.47521 0.57446 0.81063



C -2.32059 -1.83476 0.4473  
O -2.04532 -2.94025 0.87754  
O -3.16631 -1.61538 -0.55681  
C -3.76951 -2.78439 -1.15018  
H -2.9706 -3.43646 -1.52628  
C -1.03581 2.70549 1.98848  
C -0.32358 3.62815 2.65259  
H -1.62822 1.98963 2.56225  
H 0.2939 4.34116 2.09961  
C -0.30597 3.75718 4.13257  
H 0.71558 3.65575 4.52679  
H -0.65604 4.75243 4.44352  
H -0.94077 3.0028 4.61385  
H -4.31112 -3.33133 -0.36825  
C -4.68006 -2.30844 -2.24707  
H -5.16628 -3.16734 -2.72449  
H -5.46113 -1.64818 -1.85074  
H -4.11945 -1.76233 -3.01656

### 13

E(RM06) = -1352.41770387  
Zero-point correction= 0.416081 (Hartree/Particle)  
Thermal correction to Energy= 0.443002  
Thermal correction to Enthalpy= 0.443947  
Thermal correction to Gibbs Free Energy= 0.357404  
Sum of electronic and zero-point Energies= -1352.001623  
Sum of electronic and thermal Energies= -1351.974702  
Sum of electronic and thermal Enthalpies= -1351.973757  
Sum of electronic and thermal Free Energies= -1352.060299  
E(RM06L) = -1353.68446123

C -1.56148 2.63326 1.10946  
C -2.88896 0.77584 0.74865  
C -3.80791 1.21861 1.69781  
C -3.58098 2.41749 2.35844  
C -2.43767 3.14336 2.05657  
H -0.65478 3.17867 0.86118  
H -4.68521 0.62318 1.93589  
H -4.28754 2.77361 3.10461  
H -2.2135 4.08738 2.54555  
C -3.07859 -0.48383 0.01067  
C -4.32813 -1.08858 -0.09686  
C -2.12867 -2.14799 -1.29366  
C -4.46332 -2.26283 -0.82337  
H -5.19772 -0.62912 0.36422  
C -3.34204 -2.80422 -1.43366  
H -1.23851 -2.5553 -1.76003  
H -5.43574 -2.74044 -0.91731  
H -3.39223 -3.71751 -2.01982  
Pd -0.25933 0.26358 -0.65412  
N -1.9876 -1.019 -0.58757  
N -1.7713 1.48018 0.46375  
C 2.76594 1.01308 -0.84255  
C 3.57508 1.97927 -0.24193  
C 3.15827 -0.32399 -0.77259  
C 4.75359 1.60563 0.39812

H 3.29512 3.03014 -0.31154  
C 4.33572 -0.71146 -0.15385  
C 5.13682 0.26607 0.43111  
H 5.38512 2.36504 0.85514  
H 4.59937 -1.76694 -0.11722  
H 6.06405 -0.02343 0.92252  
C 1.0113 -1.36614 -1.02321  
H 0.5372 -1.91581 -1.84189  
O 2.35795 -1.25111 -1.38581  
C 0.85366 -2.10897 0.28956  
O 0.1 -3.04503 0.45353  
O 1.65289 -1.6161 1.23374  
C 1.60977 -2.26462 2.52222  
H 0.60094 -2.14008 2.93699  
C 1.54704 1.31012 -1.60524  
C 0.65024 2.29471 -1.27432  
H 1.49052 0.87892 -2.61039  
H 0.82199 2.82376 -0.33289  
C -0.31663 2.89265 -2.23928  
H -1.28189 3.12908 -1.77616  
H 0.09854 3.8399 -2.617  
H -0.48611 2.23233 -3.09901  
H 1.78639 -3.33804 2.38007  
C 2.66268 -1.62213 3.38126  
H 2.63359 -2.05451 4.38853  
H 3.66483 -1.78688 2.9668  
H 2.49593 -0.54074 3.466

#### 14

E(RM06) = -1352.39962092  
Zero-point correction= 0.416259 (Hartree/Particle)  
Thermal correction to Energy= 0.442734  
Thermal correction to Enthalpy= 0.443678  
Thermal correction to Gibbs Free Energy= 0.359382  
Sum of electronic and zero-point Energies= -1351.983361  
Sum of electronic and thermal Energies= -1351.956887  
Sum of electronic and thermal Enthalpies= -1351.955943  
Sum of electronic and thermal Free Energies= -1352.040239  
E(RM06L) = -1353.66530784

C -3.91586 -3.53764 0.0203  
C -2.91205 -1.45482 0.16765  
C -4.14467 -0.84882 0.39554  
C -5.29135 -1.6309 0.42907  
C -5.17684 -3.00153 0.24218  
H -3.78503 -4.60742 -0.13221  
H -4.2042 0.22191 0.57192  
H -6.26056 -1.17248 0.61223  
H -6.04354 -3.65638 0.27052  
C -1.65255 -0.69154 0.15469  
C -1.60519 0.67571 -0.10601  
C 0.65808 -0.77609 0.34995  
C -0.37578 1.32012 -0.12836  
H -2.51806 1.22688 -0.31723  
C 0.77914 0.58273 0.09854  
H 1.54019 -1.39103 0.52264

H -0.32207 2.38651 -0.33545  
H 1.76329 1.04257 0.07909  
Pd -0.75048 -3.57576 0.3257  
N -0.52631 -1.39954 0.39002  
N -2.80795 -2.78848 -0.03095  
C -0.92439 -5.4042 -0.55909  
C -1.8084 -5.3213 -1.64464  
C -0.16754 -6.57732 -0.43498  
C -1.99773 -6.37865 -2.53138  
H -2.36104 -4.40115 -1.82557  
C -0.37195 -7.64855 -1.31042  
C -1.28947 -7.56118 -2.34427  
H -2.69777 -6.26873 -3.35781  
H 0.23817 -8.53913 -1.16502  
H -1.42948 -8.40513 -3.0174  
C 1.44605 -5.69439 1.06679  
H 2.1122 -6.12185 1.83246  
O 0.81792 -6.80778 0.48352  
C 2.33546 -4.9131 0.10565  
O 2.98723 -3.95248 0.4595  
O 2.29944 -5.39754 -1.12207  
C 2.97625 -4.63764 -2.14641  
H 2.6385 -3.59442 -2.07732  
C 0.42179 -4.84597 1.76058  
C 0.58341 -3.54388 2.17965  
H -0.3473 -5.44786 2.25411  
H 1.49239 -3.01593 1.88867  
C -0.24162 -2.94977 3.26994  
H 0.32023 -3.03749 4.21341  
H -0.4351 -1.88237 3.11367  
H -1.19575 -3.47677 3.39624  
H 4.0548 -4.66261 -1.94664  
C 2.61268 -5.26802 -3.46114  
H 3.07804 -4.71336 -4.2843  
H 2.95666 -6.3084 -3.50777  
H 1.52408 -5.2565 -3.60536

## 15

E(RM06) = -1352.44549284  
Zero-point correction= 0.418261 (Hartree/Particle)  
Thermal correction to Energy= 0.444251  
Thermal correction to Enthalpy= 0.445195  
Thermal correction to Gibbs Free Energy= 0.360267  
Sum of electronic and zero-point Energies= -1352.027231  
Sum of electronic and thermal Energies= -1352.001242  
Sum of electronic and thermal Enthalpies= -1352.000297  
Sum of electronic and thermal Free Energies= -1352.085226  
E(RM06L) = -1353.70639833

C 2.76313 -1.77073 -1.3361  
C 3.31098 0.0645 -0.01616  
C 4.64278 -0.33965 0.00998  
C 5.03121 -1.49076 -0.66048  
C 4.07552 -2.21778 -1.35458  
H 1.99053 -2.31746 -1.87123  
H 5.38167 0.2473 0.54777

H 6.07127 -1.80768 -0.64413  
H 4.32823 -3.11946 -1.90526  
C 2.85399 1.30485 0.64553  
C 3.69647 2.13294 1.3839  
C 1.05648 2.72497 1.02923  
C 3.1786 3.28927 1.95406  
H 4.74575 1.8877 1.52021  
C 1.83633 3.59786 1.77602  
H -0.00267 2.91168 0.85443  
H 3.82552 3.94441 2.53341  
H 1.39631 4.49472 2.20351  
Pd 0.43387 0.09613 -0.60725  
N 1.55268 1.61435 0.4832  
N 2.37847 -0.6687 -0.68093  
C -1.6605 -2.13094 0.60514  
C -0.68323 -2.80155 1.32322  
C -2.79748 -1.66585 1.25472  
C -0.87289 -2.99585 2.69523  
H 0.21554 -3.17258 0.82859  
C -3.01689 -1.84823 2.60857  
C -2.02652 -2.52791 3.32285  
H -0.11516 -3.51766 3.27683  
H -3.91882 -1.47421 3.08839  
H -2.16057 -2.68775 4.39151  
C -2.94787 -0.7804 -0.81799  
H -3.6548 -0.89368 -1.64752  
O -3.66531 -1.02482 0.40796  
C -2.54799 0.68425 -0.73643  
O -1.40879 1.12142 -0.56341  
O -3.58543 1.47026 -0.8129  
C -3.37711 2.90133 -0.64428  
H -2.93848 3.05996 0.34842  
C -1.79501 -1.79753 -0.85887  
C -0.51239 -1.42617 -1.58166  
H -2.20048 -2.68597 -1.38157  
H 0.15626 -2.29413 -1.48388  
C -0.69872 -1.07296 -3.04112  
H 0.26782 -0.91953 -3.54048  
H -1.22412 -1.88189 -3.57817  
H -1.28971 -0.15598 -3.18374  
H -2.6563 3.22968 -1.40241  
C -4.71726 3.56036 -0.79386  
H -4.60541 4.64365 -0.66941  
H -5.14115 3.37065 -1.78702  
H -5.42111 3.19762 -0.03554

## 16

E(RM06) = -1352.41675525  
Zero-point correction= 0.416449 (Hartree/Particle)  
Thermal correction to Energy= 0.442268  
Thermal correction to Enthalpy= 0.443212  
Thermal correction to Gibbs Free Energy= 0.358057  
Sum of electronic and zero-point Energies= -1352.000306  
Sum of electronic and thermal Energies= -1351.974488  
Sum of electronic and thermal Enthalpies= -1351.973544  
Sum of electronic and thermal Free Energies= -1352.058698

E(RM06L) = -1353.69361317

C -2.43298 -1.7291 1.4088  
C -3.25236 -1.18645 -0.69435  
C -3.98498 -0.13185 -0.15337  
C -3.91986 0.12192 1.20927  
C -3.12787 -0.69019 2.00913  
H -1.80987 -2.39322 2.00546  
H -4.62135 0.47774 -0.78845  
H -4.49074 0.94138 1.63986  
H -3.04853 -0.53536 3.08162  
C -3.28865 -1.51241 -2.13457  
C -3.79574 -0.62712 -3.08348  
C -2.80098 -3.06183 -3.77995  
C -3.80115 -0.99631 -4.42233  
H -4.16678 0.3509 -2.7903  
C -3.29812 -2.23852 -4.78189  
H -2.39261 -4.04423 -4.01295  
H -4.19043 -0.3134 -5.17424  
H -3.28048 -2.57016 -5.81652  
Pd -1.62701 -3.70764 -0.83513  
N -2.79293 -2.71589 -2.49139  
N -2.48468 -1.97294 0.09415  
C -0.68374 -5.75805 -1.09931  
C -2.00667 -6.13164 -1.39483  
C 0.26585 -5.65284 -2.14105  
C -2.34633 -6.3777 -2.73178  
H -2.72206 -6.31022 -0.59255  
C -0.06564 -5.87517 -3.46352  
C -1.38813 -6.2501 -3.73454  
H -3.35838 -6.68772 -2.98237  
H 0.68689 -5.82506 -4.2469  
H -1.66697 -6.4668 -4.76491  
C 1.49334 -5.842 -0.29444  
H 1.65951 -6.93345 -0.27713  
O 1.516 -5.43368 -1.67432  
C 2.65606 -5.22808 0.44529  
O 3.54851 -4.58887 -0.05408  
O 2.56963 -5.56069 1.73327  
C 3.63015 -5.07566 2.58564  
H 4.57947 -5.49788 2.23257  
C 0.06205 -5.59692 0.22313  
C -0.34856 -4.20449 0.68159  
H -0.203 -6.36601 0.95693  
H -0.96426 -4.24631 1.59016  
C 0.67834 -3.10155 0.70745  
H 0.21662 -2.12305 0.88936  
H 1.4052 -3.25488 1.52296  
H 1.24211 -3.03038 -0.23303  
H 3.68714 -3.98396 2.48004  
C 3.3041 -5.49606 3.99094  
H 4.08812 -5.14679 4.67305  
H 2.34878 -5.0669 4.3181  
H 3.24111 -6.58814 4.07119

E(RM06) = -1352.42714149  
Zero-point correction= 0.416862 (Hartree/Particle)  
Thermal correction to Energy= 0.442891  
Thermal correction to Enthalpy= 0.443836  
Thermal correction to Gibbs Free Energy= 0.359754  
Sum of electronic and zero-point Energies= -1352.010280  
Sum of electronic and thermal Energies= -1351.984250  
Sum of electronic and thermal Enthalpies= -1351.983306  
Sum of electronic and thermal Free Energies= -1352.067388  
E(RM06L) = -1353.69151890

C -0.45793 -0.80362 0.64428  
C -2.74151 -1.25097 0.51981  
C -3.02404 -0.0692 1.19926  
C -1.98315 0.75711 1.60186  
C -0.67502 0.38619 1.32337  
H 0.54951 -1.13846 0.4061  
H -4.04996 0.20503 1.42649  
H -2.19744 1.68076 2.13468  
H 0.17049 0.99852 1.62437  
C -3.79256 -2.19592 0.08311  
C -5.15304 -1.92218 0.19831  
C -4.24995 -4.27838 -0.83853  
C -6.07408 -2.87401 -0.22148  
H -5.50141 -0.97521 0.60066  
C -5.62056 -4.07718 -0.74502  
H -3.8398 -5.20015 -1.24752  
H -7.13956 -2.67126 -0.13909  
H -6.30816 -4.84795 -1.0821  
Pd -1.20109 -3.45357 -0.70536  
N -3.3615 -3.36471 -0.43869  
N -1.46023 -1.59768 0.24995  
C 0.96515 -5.52872 -2.73178  
C 0.71064 -5.24611 -4.06381  
C 1.9442 -6.45636 -2.38382  
C 1.46234 -5.90596 -5.03871  
H -0.06341 -4.532 -4.34485  
C 2.70977 -7.11278 -3.33199  
C 2.45212 -6.81737 -4.67162  
H 1.27307 -5.7074 -6.09171  
H 3.46902 -7.83312 -3.03587  
H 3.0303 -7.32117 -5.44442  
C 0.88932 -6.07381 -0.45478  
H 0.10898 -6.84967 -0.40059  
O 2.05867 -6.63688 -1.0352  
C 1.17801 -5.56405 0.93586  
O 2.2705 -5.35618 1.40155  
O 0.01776 -5.31788 1.54693  
C 0.086 -4.58795 2.79099  
H 0.60584 -5.20772 3.53193  
C 0.43313 -4.96228 -1.43907  
C 0.78842 -3.55196 -1.09811  
H -0.73927 -5.05568 -1.5058  
H 1.35979 -3.42624 -0.16901  
C 1.20069 -2.59706 -2.17658  
H 1.25036 -1.57261 -1.7852

H 2.20421 -2.85078 -2.55661  
H 0.51358 -2.60292 -3.03237  
H 0.6853 -3.68155 2.6231  
C -1.32464 -4.26588 3.19571  
H -1.32269 -3.69628 4.1326  
H -1.81984 -3.66035 2.42307  
H -1.91057 -5.18036 3.35009

## 18

E(RM06) = -1352.41633686  
Zero-point correction= 0.414569 (Hartree/Particle)  
Thermal correction to Energy= 0.441279  
Thermal correction to Enthalpy= 0.442224  
Thermal correction to Gibbs Free Energy= 0.356069  
Sum of electronic and zero-point Energies= -1352.001768  
Sum of electronic and thermal Energies= -1351.975057  
Sum of electronic and thermal Enthalpies= -1351.974113  
Sum of electronic and thermal Free Energies= -1352.060268  
E(RM06L) = -1353.68300287

C -1.57939 -1.7369 1.41067  
C -3.42575 -1.6116 0.01187  
C -4.15433 -0.95635 1.00222  
C -3.5564 -0.68806 2.2266  
C -2.23955 -1.07235 2.43507  
H -0.54595 -2.0539 1.54025  
H -5.18165 -0.65003 0.82908  
H -4.11709 -0.17614 3.00526  
H -1.72508 -0.87065 3.37062  
C -3.97629 -1.88031 -1.3333  
C -5.25648 -1.48972 -1.71504  
C -3.59117 -2.76399 -3.45868  
C -5.7003 -1.75159 -3.00427  
H -5.91122 -0.97875 -1.01577  
C -4.8545 -2.39646 -3.89525  
H -2.89227 -3.27381 -4.11507  
H -6.70043 -1.4492 -3.30607  
H -5.15748 -2.618 -4.91467  
Pd -1.31964 -3.14028 -1.45833  
N -3.16256 -2.51496 -2.21219  
N -2.15297 -2.01211 0.23575  
C 1.27374 -5.10647 -2.33552  
C 2.04202 -4.44832 -3.29407  
C 1.30515 -6.50095 -2.26795  
C 2.8231 -5.20536 -4.1619  
H 2.01802 -3.36403 -3.38383  
C 2.0832 -7.27308 -3.11543  
C 2.84536 -6.59977 -4.06637  
H 3.4204 -4.70654 -4.92223  
H 2.08607 -8.35748 -3.03321  
H 3.46469 -7.1745 -4.75281  
C -0.24164 -5.95191 -0.72939  
H -1.27391 -6.0305 -1.09754  
O 0.51441 -7.01893 -1.29196  
C -0.22563 -6.04986 0.78284  
O 0.6984 -6.46603 1.43568

O -1.35731 -5.54428 1.27171  
C -1.44141 -5.41546 2.70844  
H -1.22899 -6.3924 3.15905  
C 0.42746 -4.65571 -1.22035  
C 0.56547 -3.51873 -0.4333  
H -0.95527 -3.82733 -2.80288  
H 0.22042 -3.61453 0.6009  
C 1.53073 -2.40288 -0.69371  
H 1.29959 -1.54192 -0.05469  
H 2.55738 -2.72701 -0.46019  
H 1.51657 -2.05753 -1.73276  
H -0.6596 -4.71529 3.03559  
C -2.82444 -4.92601 3.03442  
H -2.92546 -4.79441 4.11819  
H -3.02896 -3.96072 2.55089  
H -3.58215 -5.64689 2.7039

## 19

E(RM06) = -1352.41841203  
Zero-point correction= 0.413684 (Hartree/Particle)  
Thermal correction to Energy= 0.440637  
Thermal correction to Enthalpy= 0.441581  
Thermal correction to Gibbs Free Energy= 0.351052  
Sum of electronic and zero-point Energies= -1352.004728  
Sum of electronic and thermal Energies= -1351.977775  
Sum of electronic and thermal Enthalpies= -1351.976831  
Sum of electronic and thermal Free Energies= -1352.067360  
E(RM06L) = -1353.68446413

C -2.30298 -1.43595 1.2487  
C -3.66007 -1.02326 -0.58487  
C -4.36497 -0.05832 0.13018  
C -4.01056 0.21332 1.44481  
C -2.96239 -0.48974 2.02042  
H -1.47525 -2.00504 1.66594  
H -5.18911 0.48053 -0.32763  
H -4.55405 0.96633 2.01089  
H -2.65251 -0.31649 3.04724  
C -3.99446 -1.37664 -1.9792  
C -5.00208 -0.73759 -2.69603  
C -3.53396 -2.74834 -3.80828  
C -5.27171 -1.12759 -4.00059  
H -5.57812 0.06386 -2.24319  
C -4.52753 -2.15158 -4.56877  
H -2.92283 -3.55143 -4.2088  
H -6.05852 -0.63206 -4.56449  
H -4.703 -2.49057 -5.58587  
Pd -1.73839 -3.17211 -1.3792  
N -3.27252 -2.37325 -2.54682  
N -2.63129 -1.69674 -0.01966  
C 0.94471 -5.09189 -1.89597  
C 2.03179 -4.43309 -2.46958  
C 0.59648 -6.36958 -2.34794  
C 2.73838 -5.07218 -3.484  
H 2.33274 -3.44283 -2.13695  
C 1.28167 -7.01937 -3.35951



C 2.3625 -6.34482 -3.92331  
H 3.59503 -4.57726 -3.9366  
H 0.98465 -8.01276 -3.68728  
H 2.92968 -6.82585 -4.71832  
C -0.73421 -6.06469 -0.57641  
H -1.81296 -5.96507 -0.42215  
O -0.49569 -6.87761 -1.71561  
C -0.09956 -6.72946 0.64637  
O 0.77123 -7.56145 0.59902  
O -0.63646 -6.22828 1.75471  
C -0.0858 -6.70673 3.00438  
H -0.26135 -7.7881 3.06332  
C -0.02235 -4.74202 -0.85068  
C -0.09077 -3.64269 -0.00793  
H -1.35205 -4.15701 -2.52067  
H -0.64185 -3.79929 0.92477  
C 0.90159 -2.51721 -0.02938  
H 0.56243 -1.68494 0.59848  
H 1.87522 -2.85193 0.36158  
H 1.06422 -2.1233 -1.04021  
H 0.99826 -6.53856 2.99099  
C -0.76814 -5.95461 4.11149  
H -0.38033 -6.2907 5.08026  
H -0.58473 -4.87592 4.02552  
H -1.85112 -6.12817 4.09708

## 20

E(RM06) = -1352.41947510  
Zero-point correction= 0.414699 (Hartree/Particle)  
Thermal correction to Energy= 0.441449  
Thermal correction to Enthalpy= 0.442394  
Thermal correction to Gibbs Free Energy= 0.355162  
Sum of electronic and zero-point Energies= -1352.004776  
Sum of electronic and thermal Energies= -1351.978026  
Sum of electronic and thermal Enthalpies= -1351.977082  
Sum of electronic and thermal Free Energies= -1352.064313  
E(RM06L) = -1353.68548899

C -1.41894 -3.8461 -4.67057  
C -3.48089 -2.80473 -4.56683  
C -3.62007 -2.8998 -5.94941  
C -2.61272 -3.49138 -6.70066  
C -1.484 -3.96802 -6.05223  
H -0.55094 -4.20515 -4.12555  
H -4.50833 -2.52252 -6.44722  
H -2.71512 -3.57377 -7.78034  
H -0.66313 -4.43361 -6.5914  
C -4.50835 -2.17266 -3.7155  
C -5.64434 -1.55861 -4.23782  
C -5.19481 -1.64761 -1.55192  
C -6.57122 -0.98343 -3.38025  
H -5.80989 -1.52243 -5.31024  
C -6.34648 -1.02904 -2.0115  
H -4.97324 -1.70429 -0.49036  
H -7.45971 -0.50255 -3.78282  
H -7.04396 -0.59345 -1.30156

Pd -2.52357 -3.12018 -1.70257  
N -4.2965 -2.20452 -2.37961  
N -2.38585 -3.29025 -3.93789  
C 0.04093 -5.05664 -1.96734  
C 1.19461 -4.58917 -2.60196  
C -0.44233 -6.33543 -2.2749  
C 1.80512 -5.39645 -3.55802  
H 1.61416 -3.61473 -2.36284  
C 0.13496 -7.14145 -3.24071  
C 1.26909 -6.64637 -3.88227  
H 2.70753 -5.05033 -4.05728  
H -0.27148 -8.12508 -3.46391  
H 1.75782 -7.2583 -4.63842  
C -1.63144 -5.74033 -0.47521  
H -2.69025 -5.54543 -0.27603  
O -1.52731 -6.68325 -1.53567  
C -0.97208 -6.31855 0.77505  
O -0.165 -7.21408 0.7734  
O -1.39763 -5.6547 1.84555  
C -0.79311 -6.02008 3.10856  
H -1.01915 -7.07565 3.30367  
C -0.84986 -4.51118 -0.94431  
C -0.79947 -3.30598 -0.25814  
H -2.96139 -2.88404 -0.23716  
H -1.23623 -3.29082 0.74086  
C 0.15873 -2.19645 -0.55856  
H -0.20626 -1.25319 -0.13672  
H 1.13689 -2.40747 -0.0977  
H 0.31442 -2.04875 -1.63407  
H 0.29516 -5.91786 3.01274  
C -1.36327 -5.10915 4.15837  
H -0.93086 -5.35526 5.1353  
H -1.13221 -4.05956 3.93667  
H -2.4523 -5.22041 4.22771

## 21

E(RM06) = -1352.43945318  
Zero-point correction= 0.416439 (Hartree/Particle)  
Thermal correction to Energy= 0.443052  
Thermal correction to Enthalpy= 0.443996  
Thermal correction to Gibbs Free Energy= 0.356563  
Sum of electronic and zero-point Energies= -1352.023014  
Sum of electronic and thermal Energies= -1351.996401  
Sum of electronic and thermal Enthalpies= -1351.995457  
Sum of electronic and thermal Free Energies= -1352.082890  
E(RM06L) = -1353.70377393

C -2.12334 -4.77419 -4.58159  
C -3.85104 -3.22507 -4.46952  
C -4.27848 -3.58675 -5.74441  
C -3.59965 -4.57796 -6.44085  
C -2.49673 -5.18153 -5.85445  
H -1.25364 -5.20843 -4.08927  
H -5.13142 -3.09486 -6.2029  
H -3.92851 -4.86615 -7.43676  
H -1.92668 -5.95376 -6.36353

C -4.50386 -2.15545 -3.68431  
C -5.65104 -1.49087 -4.11227  
C -4.43492 -0.86815 -1.75317  
C -6.18872 -0.48488 -3.31966  
H -6.13244 -1.75127 -5.05054  
C -5.57168 -0.16058 -2.11874  
H -3.91356 -0.6577 -0.82063  
H -7.08504 0.04011 -3.64237  
H -5.95827 0.62144 -1.47095  
Pd -2.2745 -3.14999 -1.93089  
N -3.9169 -1.83801 -2.51218  
N -2.78413 -3.83467 -3.90102  
C 0.2833 -4.66408 -2.05033  
C 1.24197 -3.89538 -2.71794  
C 0.16469 -6.02451 -2.36915  
C 2.06666 -4.51107 -3.65389  
H 1.34502 -2.83116 -2.51765  
C 0.97739 -6.65686 -3.2958  
C 1.93709 -5.87488 -3.93473  
H 2.82325 -3.92448 -4.17095  
H 0.85845 -7.71667 -3.50943  
H 2.59606 -6.33683 -4.66771  
C -1.34956 -5.73323 -0.73922  
H -2.44617 -5.77614 -0.72805  
O -0.86037 -6.63615 -1.72286  
C -0.79933 -6.16991 0.61544  
O 0.28941 -6.66611 0.77157  
O -1.66265 -5.87678 1.58425  
C -1.2122 -6.13258 2.93627  
H -1.01254 -7.20687 3.03276  
C -0.7971 -4.34754 -1.11614  
C -0.83097 -3.25807 -0.10366  
H -1.77128 -2.56506 -0.28254  
H -1.13036 -3.64554 0.87949  
C 0.35658 -2.31831 -0.00135  
H 0.21215 -1.61856 0.82957  
H 1.27597 -2.88817 0.1856  
H 0.49298 -1.7269 -0.9133  
H -0.2669 -5.59646 3.0905  
C -2.29497 -5.66453 3.86626  
H -1.99344 -5.84545 4.90465  
H -2.48042 -4.58968 3.74611  
H -3.23243 -6.2035 3.68263

## 22

E(RM06) = -1352.44095238  
Zero-point correction= 0.417007 (Hartree/Particle)  
Thermal correction to Energy= 0.443411  
Thermal correction to Enthalpy= 0.444355  
Thermal correction to Gibbs Free Energy= 0.359048  
Sum of electronic and zero-point Energies= -1352.023945  
Sum of electronic and thermal Energies= -1351.997541  
Sum of electronic and thermal Enthalpies= -1351.996597  
Sum of electronic and thermal Free Energies= -1352.081904  
E(RM06L) = -1353.70573089

C 1.8619 3.30408 0.90765  
C 3.05277 1.86003 -0.46772  
C 4.21215 2.61042 -0.28853  
C 4.17122 3.74176 0.51664  
C 2.97688 4.10159 1.12624  
H 0.90119 3.53743 1.36376  
H 5.14573 2.31878 -0.76065  
H 5.0712 4.33399 0.66615  
H 2.90286 4.97892 1.76284  
C 3.00133 0.64237 -1.3057  
C 4.08685 0.19842 -2.05688  
C 1.71926 -1.14841 -2.05312  
C 3.96764 -0.95773 -2.81647  
H 5.02203 0.75083 -2.05993  
C 2.76413 -1.64925 -2.81573  
H 0.75315 -1.64947 -2.02488  
H 4.81118 -1.3111 -3.40516  
H 2.62541 -2.55833 -3.39435  
Pd 0.24945 0.83746 -0.18058  
N 1.83114 -0.03736 -1.31872  
N 1.89882 2.21518 0.1346  
C -2.01146 -0.15101 -1.67029  
C -1.90042 -0.79855 -2.90336  
C -2.85598 0.95657 -1.55336  
C -2.60708 -0.28881 -3.9859  
H -1.27142 -1.68141 -3.01309  
C -3.56494 1.48698 -2.61735  
C -3.4229 0.84101 -3.843  
H -2.5303 -0.77396 -4.95682  
H -4.21314 2.35071 -2.48947  
H -3.96984 1.21713 -4.70564  
C -1.99255 0.69457 0.4951  
H -1.16835 1.47152 0.818  
O -2.9162 1.42462 -0.27511  
C -2.63206 0.24411 1.79781  
O -3.71507 -0.28412 1.83138  
O -1.83468 0.47109 2.83082  
C -2.27742 -0.0572 4.10662  
H -2.49072 -1.12616 3.97514  
C -1.39687 -0.39711 -0.36755  
C -1.19078 -1.82097 0.09467  
H -2.18567 -2.23294 0.33845  
H -0.84548 -2.39996 -0.77534  
C -0.23726 -2.04793 1.25782  
H -0.19311 -3.11641 1.50222  
H 0.78034 -1.71515 1.01047  
H -0.54729 -1.51568 2.16706  
H -3.21243 0.44797 4.37745  
C -1.1771 0.19148 5.09763  
H -1.47399 -0.19219 6.08064  
H -0.25314 -0.31807 4.79564  
H -0.97016 1.26412 5.19658

## 23

E(RM06) = -1352.42855580

Zero-point correction= 0.414532 (Hartree/Particle)

Thermal correction to Energy= 0.441284  
Thermal correction to Enthalpy= 0.442228  
Thermal correction to Gibbs Free Energy= 0.356902  
Sum of electronic and zero-point Energies= -1352.014024  
Sum of electronic and thermal Energies= -1351.987272  
Sum of electronic and thermal Enthalpies= -1351.986328  
Sum of electronic and thermal Free Energies= -1352.071654  
E(RM06L) = -1353.69765244

C 1.91701 3.50559 0.95494  
C 2.92587 2.05151 -0.56418  
C 4.04603 2.87583 -0.62632  
C 4.08964 4.03782 0.1308  
C 3.00852 4.35903 0.93884  
H 1.04485 3.72072 1.5642  
H 4.88419 2.61809 -1.26678  
H 4.96281 4.68453 0.08585  
H 2.99652 5.25755 1.54924  
C 2.81875 0.79505 -1.33116  
C 3.8597 0.31673 -2.12385  
C 1.51629 -1.03707 -1.88018  
C 3.70129 -0.87775 -2.81316  
H 4.79419 0.86394 -2.20286  
C 2.50713 -1.57258 -2.69085  
H 0.5689 -1.55467 -1.75294  
H 4.50817 -1.25927 -3.43466  
H 2.33673 -2.51394 -3.20596  
Pd 0.21844 1.11556 0.14954  
N 1.65587 0.11467 -1.21898  
N 1.87383 2.37977 0.22373  
C -1.91909 -0.33386 -1.54919  
C -1.81183 -1.13439 -2.69252  
C -2.589 0.89195 -1.63734  
C -2.3419 -0.65377 -3.88079  
H -1.33992 -2.11527 -2.65082  
C -3.11294 1.40034 -2.81435  
C -2.97295 0.59911 -3.94132  
H -2.27492 -1.25874 -4.78264  
H -3.62106 2.36115 -2.84117  
H -3.37811 0.94477 -4.8904  
C -2.00062 0.67796 0.46876  
H -0.48913 2.0576 1.15554  
O -2.66879 1.49033 -0.41994  
C -2.44355 0.89354 1.87729  
O -3.15767 1.80767 2.21518  
O -1.977 -0.0577 2.67653  
C -2.36875 0.01694 4.06564  
H -3.46416 -0.01749 4.11584  
C -1.51372 -0.48689 -0.16166  
C -1.15411 -1.81462 0.45839  
H -2.022 -2.12624 1.05989  
H -1.07886 -2.54392 -0.36101  
C 0.0993 -1.90322 1.31897  
H 0.17366 -2.9093 1.75192  
H 1.00935 -1.72605 0.73137  
H 0.07689 -1.1836 2.14467  
H -2.03977 0.98298 4.46855

C -1.72691 -1.14781 4.76562  
H -2.04287 -1.16903 5.81514  
H -2.02387 -2.09567 4.29791  
H -0.63269 -1.07331 4.73924

## 24

E(RM06) = -729.018290282  
Zero-point correction= 0.244877 (Hartree/Particle)  
Thermal correction to Energy= 0.259664  
Thermal correction to Enthalpy= 0.260608  
Thermal correction to Gibbs Free Energy= 0.202405  
Sum of electronic and zero-point Energies= -728.773413  
Sum of electronic and thermal Energies= -728.758626  
Sum of electronic and thermal Enthalpies= -728.757682  
Sum of electronic and thermal Free Energies= -728.815886  
E(RM06L) = -729.697012157

C -2.20058 -0.48837 -1.60022  
C -1.79749 -1.14132 -2.77281  
C -2.78652 0.782 -1.68815  
C -2.00109 -0.4958 -3.9818  
H -1.33632 -2.12772 -2.73245  
C -3.00023 1.44503 -2.88927  
C -2.59478 0.77873 -4.03778  
H -1.6972 -0.97936 -4.9086  
H -3.45909 2.43053 -2.92013  
H -2.7395 1.25486 -5.0061  
C -2.71193 0.26864 0.42878  
O -3.10167 1.24697 -0.45615  
C -2.91991 0.50201 1.85594  
O -2.56208 -0.28002 2.71697  
O -3.53861 1.65892 2.09856  
C -3.77322 1.9656 3.48508  
H -2.81033 1.97224 4.0124  
C -2.16664 -0.81492 -0.20101  
C -1.59228 -2.05444 0.39697  
H -2.11857 -2.29526 1.32781  
H -1.75313 -2.89019 -0.29976  
C -0.10006 -1.89735 0.67776  
H 0.32236 -2.82482 1.08423  
H 0.45249 -1.6446 -0.23776  
H 0.07232 -1.09541 1.40782  
H -4.38735 1.16795 3.92319  
C -4.4586 3.3029 3.53716  
H -4.65866 3.57826 4.57951  
H -3.83108 4.08342 3.08955  
H -5.41413 3.2758 2.99908

## 25

E(RM06) = -728.995834055  
Zero-point correction= 0.243918 (Hartree/Particle)  
Thermal correction to Energy= 0.258870  
Thermal correction to Enthalpy= 0.259815  
Thermal correction to Gibbs Free Energy= 0.200628  
Sum of electronic and zero-point Energies= -728.751916  
Sum of electronic and thermal Energies= -728.736964

Sum of electronic and thermal Enthalpies= -728.736020  
Sum of electronic and thermal Free Energies= -728.795206  
E(RM06L) = -729.673253523

C -2.13891 -0.38035 -1.44003  
C -1.47036 -0.71521 -2.61298  
C -2.98582 0.72905 -1.42103  
C -1.66573 0.07391 -3.7458  
H -0.80498 -1.57785 -2.64368  
C -3.20036 1.52428 -2.53394  
C -2.52106 1.17716 -3.70283  
H -1.14666 -0.17087 -4.67075  
H -3.86901 2.38126 -2.48922  
H -2.66236 1.78228 -4.59711  
C -3.03629 -0.02319 0.7107  
O -3.58251 0.92133 -0.21353  
C -2.15961 0.67291 1.74096  
O -2.05923 0.28818 2.88465  
O -1.48706 1.68905 1.21564  
C -0.56666 2.36475 2.0976  
H 0.15398 1.62942 2.47808  
C -2.19022 -0.98663 -0.11269  
C -1.63576 -2.13046 0.30883  
H -3.86142 -0.50987 1.24598  
H -1.04164 -2.69266 -0.41629  
C -1.75367 -2.71418 1.67311  
H -1.9931 -3.78525 1.61881  
H -0.8035 -2.63521 2.22368  
H -2.51773 -2.21366 2.27957  
H -1.12977 2.75758 2.95383  
C 0.09638 3.45432 1.30245  
H 0.80809 3.99614 1.93668  
H 0.64431 3.03865 0.44793  
H -0.64299 4.17117 0.92485

## 26

E(RM06) = -728.979613668  
Zero-point correction= 0.244140 (Hartree/Particle)  
Thermal correction to Energy= 0.258828  
Thermal correction to Enthalpy= 0.259772  
Thermal correction to Gibbs Free Energy= 0.200963  
Sum of electronic and zero-point Energies= -728.735473  
Sum of electronic and thermal Energies= -728.720786  
Sum of electronic and thermal Enthalpies= -728.719842  
Sum of electronic and thermal Free Energies= -728.778651  
E(RM06L) = -729.655060555

C -2.18193 -0.40149 -1.41233  
C -1.48109 -0.70454 -2.56701  
C -3.02109 0.70611 -1.37583  
C -1.64317 0.11816 -3.68628  
H -0.8159 -1.56804 -2.59729  
C -3.20619 1.53362 -2.47046  
C -2.49888 1.21735 -3.63323  
H -1.09827 -0.10046 -4.60293  
H -3.86784 2.39562 -2.41657

H -2.61616 1.85026 -4.51178  
C -3.01774 -0.02739 0.75988  
O -3.63222 0.8692 -0.16999  
C -2.08259 0.71253 1.69728  
O -1.90035 0.36365 2.84206  
O -1.45742 1.72095 1.09872  
C -0.47844 2.41908 1.89569  
H 0.27172 1.69316 2.23748  
H -3.80289 -0.47591 1.37653  
H -0.97821 2.82726 2.78339  
C 0.11967 3.49366 1.03171  
H 0.87369 4.05085 1.60037  
H 0.60484 3.06212 0.14757  
H -0.64884 4.20016 0.69497  
C -2.25492 -1.10337 -0.07779  
H -2.89351 -1.99732 -0.15731  
C -0.92086 -1.52099 0.45998  
H -0.17429 -0.72771 0.57152  
C -0.59951 -2.77956 0.74647  
H -1.32007 -3.59089 0.63163  
H 0.39139 -3.05037 1.1073

#### A

E(RM06) = -1352.43273699  
Zero-point correction= 0.417245 (Hartree/Particle)  
Thermal correction to Energy= 0.443210  
Thermal correction to Enthalpy= 0.444154  
Thermal correction to Gibbs Free Energy= 0.358433  
Sum of electronic and zero-point Energies= -1352.015492  
Sum of electronic and thermal Energies= -1351.989527  
Sum of electronic and thermal Enthalpies= -1351.988583  
Sum of electronic and thermal Free Energies= -1352.074304  
E(RM06L) = -1353.69691814

C 0.03123 -1.92951 0.90269  
C -2.00575 -0.96339 0.3428  
C -1.61795 0.24303 0.9201  
C -0.36095 0.34287 1.50371  
C 0.48185 -0.76025 1.50025  
H 0.65167 -2.82353 0.86831  
H -2.28082 1.10362 0.91522  
H -0.04628 1.27984 1.95765  
H 1.47171 -0.7241 1.94674  
C -3.32565 -1.16813 -0.29136  
C -4.31506 -0.18883 -0.30547  
C -4.72969 -2.63591 -1.43106  
C -5.53821 -0.45661 -0.90526  
H -4.1406 0.77952 0.15472  
C -5.75447 -1.70254 -1.47718  
H -4.8579 -3.62783 -1.85885  
H -6.31564 0.30393 -0.91861  
H -6.69753 -1.9586 -1.95202  
Pd -1.95382 -3.74907 -0.72971  
N -3.54684 -2.37813 -0.86016  
N -1.17629 -2.02849 0.3404  
C -1.51577 -4.5452 -3.91025



C -1.04037 -3.24294 -3.84804  
C -0.81293 -5.50444 -4.63277  
C 0.14 -2.92308 -4.5243  
H -1.58367 -2.48107 -3.28539  
C 0.36519 -5.21742 -5.30425  
C 0.83198 -3.90403 -5.2357  
H 0.51901 -1.90308 -4.49973  
H 0.89321 -5.98756 -5.86235  
H 1.75044 -3.64131 -5.75835  
C -2.70518 -6.55495 -4.0572  
H -3.41515 -6.45234 -4.89159  
O -1.3959 -6.73482 -4.59187  
C -3.08622 -7.75458 -3.22505  
O -2.31632 -8.56643 -2.77181  
O -4.40578 -7.73876 -3.02478  
C -4.94361 -8.76869 -2.16521  
H -4.24864 -8.92562 -1.33135  
C -2.68589 -5.21965 -3.24041  
C -2.51179 -5.41757 -1.74671  
H -3.63449 -4.69359 -3.41268  
H -3.4031 -5.84121 -1.26577  
C -1.21976 -5.88835 -1.2056  
H -1.30593 -6.66626 -0.4413  
H -0.45649 -6.13636 -1.9526  
H -0.65329 -5.03438 -0.61247  
H -5.87251 -8.33977 -1.77635  
C -5.19256 -10.03763 -2.93791  
H -5.66396 -10.7832 -2.28586  
H -5.86306 -9.85153 -3.78594  
H -4.25432 -10.45941 -3.31719

## B

E(RM06) = -1352.41155451  
Zero-point correction= 0.415447 (Hartree/Particle)  
Thermal correction to Energy= 0.441459  
Thermal correction to Enthalpy= 0.442403  
Thermal correction to Gibbs Free Energy= 0.356521  
Sum of electronic and zero-point Energies= -1351.996107  
Sum of electronic and thermal Energies= -1351.970096  
Sum of electronic and thermal Enthalpies= -1351.969151  
Sum of electronic and thermal Free Energies= -1352.055034  
E(RM06L) = -1353.67780111

C -0.77558 -0.32839 -0.95777  
C -2.68212 -0.85839 0.28091  
C -2.82129 0.47353 0.65922  
C -1.90311 1.41458 0.21155  
C -0.85902 1.01066 -0.6083  
H 0.01906 -0.69738 -1.60006  
H -3.64465 0.78596 1.29435  
H -2.00857 2.45687 0.50364  
H -0.11869 1.71329 -0.98016  
C -3.61529 -1.91769 0.72399  
C -4.63113 -1.68844 1.64855  
C -4.22887 -4.15139 0.55451  
C -5.46342 -2.73721 2.01986

H -4.7743 -0.70656 2.09045  
C -5.2652 -3.99343 1.46442  
H -4.02838 -5.12086 0.09744  
H -6.25835 -2.56915 2.74285  
H -5.89105 -4.84107 1.72943  
Pd -1.6525 -3.25829 -1.0944  
N -3.42819 -3.14656 0.19265  
N -1.66198 -1.23779 -0.52848  
C -0.3428 -5.17524 -4.02973  
C 0.65338 -4.2132 -4.10709  
C -0.02313 -6.51604 -4.23609  
C 1.96495 -4.62061 -4.36565  
H 0.41727 -3.1563 -3.98301  
C 1.26915 -6.9489 -4.48019  
C 2.26459 -5.97207 -4.53538  
H 2.75631 -3.87733 -4.44202  
H 1.4868 -8.00315 -4.63623  
H 3.29174 -6.27356 -4.73464  
C -2.24542 -6.47849 -4.30527  
H -2.46704 -6.33152 -5.37411  
O -1.11396 -7.33297 -4.17932  
C -3.43924 -7.11 -3.63154  
O -3.3984 -8.04101 -2.86513  
O -4.53776 -6.43701 -3.98112  
C -5.77731 -6.85444 -3.36521  
H -5.58084 -7.09323 -2.31245  
C -1.81293 -5.10457 -3.70191  
C -2.14133 -5.0904 -2.22409  
H -2.352 -4.29474 -4.20909  
H -3.21723 -5.11399 -2.01845  
C -1.27607 -5.41667 -1.20125  
H -1.65763 -5.7277 -0.22733  
H -0.22179 -5.61543 -1.39674  
H -0.34789 -3.15806 -1.91879  
H -6.41586 -5.96674 -3.41394  
C -6.38015 -8.02005 -4.10455  
H -7.35218 -8.27553 -3.66517  
H -6.53673 -7.77097 -5.16127  
H -5.7342 -8.90373 -4.04324

**[BF<sub>4</sub>]<sup>-</sup>**

E(RM06) = -424.460140778  
Zero-point correction= 0.014664 (Hartree/Particle)  
Thermal correction to Energy= 0.018973  
Thermal correction to Enthalpy= 0.019917  
Thermal correction to Gibbs Free Energy= -0.012891  
Sum of electronic and zero-point Energies= -424.445477  
Sum of electronic and thermal Energies= -424.441168  
Sum of electronic and thermal Enthalpies= -424.440223  
Sum of electronic and thermal Free Energies= -424.473032  
E(RM06L) = -424.730531493

B 0.59816 -0.74896 -0.00001  
F 1.06412 -0.09034 1.14135  
F 1.06377 -2.06662 0.  
F -0.79948 -0.7494 0.00001

F 1.06414 -0.09033 -1.14135

### Phi

E(RM06) = -242.847962521  
Zero-point correction= 0.089756 (Hartree/Particle)  
Thermal correction to Energy= 0.095672  
Thermal correction to Enthalpy= 0.096616  
Thermal correction to Gibbs Free Energy= 0.057983  
Sum of electronic and zero-point Energies= -242.758207  
Sum of electronic and thermal Energies= -242.752291  
Sum of electronic and thermal Enthalpies= -242.751347  
Sum of electronic and thermal Free Energies= -242.789980  
E(RM06L) = -529.577016462

C -1.66813 -1.1409 0.00005  
C -0.27467 -1.15011 0.00056  
C 0.40344 0.06394 0.00003  
C -0.27457 1.27807 -0.00099  
C -1.66801 1.26898 -0.0015  
C -2.36499 0.06406 -0.00098  
H -2.20776 -2.08673 0.00047  
H 0.27078 -2.09171 0.00136  
H 0.271 2.2196 -0.00139  
H -2.2076 2.21483 -0.0023  
H -3.45359 0.06414 -0.00139  
I 2.54581 0.06388 0.00075

### [Phi(CH=CHMe)]<sup>+</sup>

E(RM06) = -359.829285893  
Zero-point correction= 0.159846 (Hartree/Particle)  
Thermal correction to Energy= 0.170626  
Thermal correction to Enthalpy= 0.171570  
Thermal correction to Gibbs Free Energy= 0.121025  
Sum of electronic and zero-point Energies= -359.669440  
Sum of electronic and thermal Energies= -359.658660  
Sum of electronic and thermal Enthalpies= -359.657716  
Sum of electronic and thermal Free Energies= -359.708261  
E(RM06L) = -646.699276610

C 0.03658 -3.79584 3.32202  
C 1.32351 -3.9525 3.03164  
H -0.42628 -3.00935 3.91423  
H 1.65267 -4.79179 2.41573  
C 2.36524 -3.01079 3.52151  
H 3.11223 -3.55246 4.11718  
H 2.89875 -2.56535 2.67108  
H 1.93883 -2.20747 4.13236  
C -1.5221 -6.37092 4.36504  
C -0.44059 -7.18033 4.68098  
C -0.52259 -7.93865 5.84603  
C -1.6618 -7.87708 6.64486  
C -2.73002 -7.05699 6.29333  
C -2.6709 -6.282 5.13653  
H 0.44214 -7.221 4.04563  
H 0.31004 -8.58183 6.12385  
H -1.71677 -8.47546 7.55204

H -3.61758 -7.0103 6.92121  
H -3.49543 -5.63139 4.85503  
I -1.39891 -5.18505 2.57881

### TS-1/3

E(RM06) = -1235.33406114  
Zero-point correction= 0.342118 (Hartree/Particle)  
Thermal correction to Energy= 0.364322  
Thermal correction to Enthalpy= 0.365266  
Thermal correction to Gibbs Free Energy= 0.289319  
Sum of electronic and zero-point Energies= -1234.991943  
Sum of electronic and thermal Energies= -1234.969739  
Sum of electronic and thermal Enthalpies= -1234.968795  
Sum of electronic and thermal Free Energies= -1235.044742  
E(RM06L) = -1236.47254688

C -3.7154 -3.34768 0.33224  
C -2.67202 -1.32548 0.75978  
C -3.89195 -0.74418 1.10108  
C -5.05153 -1.50493 1.03917  
C -4.96491 -2.83556 0.65427  
H -3.59728 -4.38911 0.03956  
H -3.94071 0.2886 1.43515  
H -6.00924 -1.06229 1.30426  
H -5.84194 -3.47557 0.6076  
C -1.39305 -0.5913 0.86383  
C -1.33099 0.78572 1.06964  
C 0.91887 -0.73888 0.92659  
C -0.09403 1.39824 1.2158  
H -2.23833 1.38222 1.10324  
C 1.05593 0.62236 1.15737  
H 1.79567 -1.38208 0.8646  
H -0.03298 2.47253 1.3756  
H 2.04503 1.05618 1.27715  
Pd -0.55908 -3.35288 0.00218  
N -0.26809 -1.33443 0.77438  
N -2.59782 -2.61644 0.36594  
C -0.75315 -5.15639 -0.87272  
C -1.85975 -5.70814 -1.52113  
C 0.4294 -5.92159 -0.87466  
C -1.81967 -6.98991 -2.08153  
H -2.78367 -5.13243 -1.60645  
C 0.49487 -7.20019 -1.42203  
C -0.6463 -7.73567 -2.01773  
H -2.70444 -7.39936 -2.56855  
H 1.4329 -7.75389 -1.39263  
H -0.60731 -8.73518 -2.45005  
C 1.37504 -3.95507 -0.13381  
H 1.8907 -3.71196 0.80966  
O 1.53495 -5.37706 -0.31325  
C 2.12324 -3.27906 -1.27014  
O 1.64265 -2.58107 -2.13966  
O 3.43346 -3.55404 -1.20376  
C 4.25422 -3.02359 -2.25825  
H 3.87935 -3.39726 -3.22038  
H 4.15743 -1.92958 -2.26645

C 5.66784 -3.46413 -1.9931  
H 6.33344 -3.08046 -2.7757  
H 6.02222 -3.0867 -1.02566  
H 5.74218 -4.55864 -1.98495

#### TS-4/7

E(RM06) = -1595.16273430  
Zero-point correction= 0.501387 (Hartree/Particle)  
Thermal correction to Energy= 0.536715  
Thermal correction to Enthalpy= 0.537659  
Thermal correction to Gibbs Free Energy= 0.428754  
Sum of electronic and zero-point Energies= -1594.661347  
Sum of electronic and thermal Energies= -1594.626019  
Sum of electronic and thermal Enthalpies= -1594.625075  
Sum of electronic and thermal Free Energies= -1594.733981  
E(RM06L) = -1883.17287993

C -3.58921 -2.97934 0.45826  
C -2.3901 -0.99509 0.41994  
C -3.56613 -0.26298 0.5857  
C -4.78018 -0.9288 0.67593  
C -4.79739 -2.31575 0.61297  
H -3.55012 -4.06761 0.42454  
H -3.54041 0.82008 0.65902  
H -5.70198 -0.36592 0.80463  
H -5.72256 -2.88072 0.68702  
C -1.0625 -0.34675 0.33786  
C -0.91416 1.03302 0.2094  
C 1.24282 -0.62383 0.35837  
C 0.36088 1.58241 0.16893  
H -1.78141 1.68217 0.12993  
C 1.46275 0.74244 0.25022  
H 2.07338 -1.32555 0.38594  
H 0.487 2.65822 0.06925  
H 2.47859 1.127 0.221  
Pd -0.44619 -3.35291 0.19401  
N 0.01655 -1.15963 0.40355  
N -2.4181 -2.34404 0.35352  
C -0.87038 -5.19749 -0.52328  
C -2.04302 -5.63075 -1.13  
C 0.18175 -6.1131 -0.37343  
C -2.18868 -6.97263 -1.50532  
H -2.86235 -4.93634 -1.3206  
C 0.05639 -7.44631 -0.73854  
C -1.14968 -7.87351 -1.29468  
H -3.11889 -7.30628 -1.96341  
H 0.89811 -8.12588 -0.61216  
H -1.26467 -8.91639 -1.58653  
C 1.42458 -4.23345 -0.00364  
H 2.06298 -3.83966 0.79817  
O 1.34348 -5.63861 0.15205  
C 1.97169 -3.79988 -1.32703  
O 2.43752 -2.69012 -1.5167  
O 1.88128 -4.73682 -2.26878  
C 2.33382 -4.37356 -3.58588  
H 1.76057 -3.50112 -3.92604

C -0.57441 -4.43205 2.26453  
C -1.76802 -4.73862 2.74967  
H 0.33257 -5.03656 2.22663  
H -2.55405 -3.99002 2.86376  
C -2.10819 -6.16784 3.04814  
H -2.45613 -6.27499 4.08577  
H -2.91927 -6.50977 2.3878  
H -1.24686 -6.83017 2.89767  
H 3.39005 -4.08021 -3.52799  
C 0.19557 -3.28221 5.22955  
C -0.99325 -3.26417 5.95142  
C -1.05262 -3.97836 7.1458  
C 0.05665 -4.69081 7.59365  
C 1.23551 -4.6949 6.85285  
C 1.31547 -3.9877 5.65561  
H -1.85684 -2.70488 5.59588  
H -1.97352 -3.97443 7.72611  
H 0.00212 -5.2472 8.52742  
H 2.10203 -5.25288 7.20297  
H 2.23216 -3.99024 5.06883  
I 0.2746 -2.27239 3.35719  
C 2.12354 -5.57125 -4.47046  
H 2.44736 -5.34337 -5.49297  
H 2.70131 -6.43117 -4.10955  
H 1.06379 -5.8549 -4.49856

#### TS-5/9

E(RM06) = -1595.16723958  
Zero-point correction= 0.501886 (Hartree/Particle)  
Thermal correction to Energy= 0.536648  
Thermal correction to Enthalpy= 0.537592  
Thermal correction to Gibbs Free Energy= 0.433061  
Sum of electronic and zero-point Energies= -1594.665354  
Sum of electronic and thermal Energies= -1594.630592  
Sum of electronic and thermal Enthalpies= -1594.629648  
Sum of electronic and thermal Free Energies= -1594.734179  
E(RM06L) = -1883.17617561

C -3.1678 2.76505 -1.61107  
C -1.45711 3.41998 -0.18916  
C -1.70148 4.76069 -0.48497  
C -2.70899 5.09092 -1.38135  
C -3.4605 4.07672 -1.95835  
H -3.74526 1.937 -2.02006  
H -1.12611 5.54932 -0.00888  
H -2.90839 6.13432 -1.61553  
H -4.26611 4.28809 -2.65631  
C -0.40368 3.00277 0.7643  
C 0.54935 3.8936 1.25802  
C 0.54813 1.26621 1.98158  
C 1.51524 3.43873 2.14524  
H 0.55342 4.9337 0.94527  
C 1.51727 2.10166 2.51926  
H 0.52124 0.20072 2.21327  
H 2.26282 4.12669 2.53411  
H 2.25637 1.70246 3.20872

Pd -1.80147 0.36312 0.05763  
N -0.3871 1.70291 1.13023  
N -2.19017 2.43971 -0.76176  
C -3.26827 -0.73703 -0.75643  
C -3.7657 -0.6714 -2.05513  
C -3.82447 -1.67279 0.13054  
C -4.82515 -1.49735 -2.45112  
H -3.32541 0.0187 -2.7797  
C -4.86465 -2.51153 -0.25111  
C -5.36738 -2.4084 -1.54842  
H -5.2202 -1.42486 -3.46329  
H -5.26465 -3.23448 0.45826  
H -6.18653 -3.05659 -1.85606  
C -2.01215 -1.18493 1.44334  
H -1.89485 -0.64456 2.39314  
O -3.31711 -1.72266 1.3868  
C -0.94197 -2.2113 1.32415  
O 0.23707 -1.96692 1.53854  
O -1.38726 -3.40531 0.94619  
C -0.38878 -4.4234 0.75241  
H 0.35602 -4.04713 0.03585  
C -0.00238 -0.29657 -1.10421  
C 0.32831 0.64415 -1.97807  
H 0.57575 -0.85848 -0.36534  
H -0.35329 0.94333 -2.77771  
C 1.61914 1.39436 -1.82951  
H 2.22456 1.29565 -2.74222  
H 1.42398 2.46639 -1.68062  
H 2.20858 1.0274 -0.98023  
H 0.12499 -4.59936 1.70629  
C 1.00683 -2.9243 -3.00204  
C 1.7348 -2.03644 -3.78839  
C 3.03594 -2.377 -4.15038  
C 3.58561 -3.58782 -3.73763  
C 2.8369 -4.46798 -2.96152  
C 1.53656 -4.14091 -2.58336  
H 1.2969 -1.09604 -4.11948  
H 3.61737 -1.69181 -4.76482  
H 4.6018 -3.84926 -4.0267  
H 3.26288 -5.4177 -2.6429  
H 0.94837 -4.83015 -1.979  
I -0.97231 -2.3877 -2.41261  
C -1.09342 -5.65262 0.25005  
H -0.36674 -6.45653 0.08009  
H -1.83181 -6.00778 0.9794  
H -1.61474 -5.45039 -0.69531

#### TS-6/10

E(RM06) = -1595.16574544  
Zero-point correction= 0.501766 (Hartree/Particle)  
Thermal correction to Energy= 0.536568  
Thermal correction to Enthalpy= 0.537512  
Thermal correction to Gibbs Free Energy= 0.433238  
Sum of electronic and zero-point Energies= -1594.663980  
Sum of electronic and thermal Energies= -1594.629177  
Sum of electronic and thermal Enthalpies= -1594.628233

Sum of electronic and thermal Free Energies= -1594.732508  
E(RM06L) = -1883.17547584

C -3.19446 2.76988 -1.50035  
C -1.43985 3.37033 -0.1103  
C -1.62898 4.71597 -0.4236  
C -2.63287 5.07688 -1.31229  
C -3.43705 4.08819 -1.86154  
H -3.81106 1.96143 -1.89085  
H -1.01439 5.4855 0.0343  
H -2.78946 6.12436 -1.5604  
H -4.24399 4.32412 -2.54998  
C -0.40327 2.92484 0.84816  
C 0.58778 3.78547 1.32113  
C 0.458 1.18922 2.12472  
C 1.53086 3.31424 2.22398  
H 0.63837 4.81525 0.97928  
C 1.46465 1.99202 2.64203  
H 0.37533 0.14055 2.4053  
H 2.30976 3.97768 2.59346  
H 2.17791 1.57845 3.35062  
Pd -1.8624 0.31078 0.12175  
N -0.44778 1.63511 1.247  
N -2.21841 2.41422 -0.66173  
C -3.3244 -0.74412 -0.75606  
C -3.79457 -0.62121 -2.06078  
C -3.90332 -1.70877 0.08281  
C -4.85556 -1.41901 -2.50762  
H -3.33476 0.09231 -2.74948  
C -4.949 -2.51568 -0.34925  
C -5.42626 -2.35592 -1.65005  
H -5.2314 -1.30241 -3.52298  
H -5.36965 -3.2618 0.32306  
H -6.24757 -2.98094 -1.99724  
C -2.11004 -1.29276 1.44323  
H -2.00141 -0.80058 2.42013  
O -3.41792 -1.8124 1.34363  
C -1.10195 -2.37807 1.2764  
O -1.30891 -3.48153 0.82437  
O 0.10893 -1.96019 1.69282  
C 1.20402 -2.87998 1.53142  
H 1.0122 -3.76869 2.14624  
C -0.08842 -0.3251 -1.0597  
C 0.27039 0.64987 -1.88688  
H 0.50959 -0.91344 -0.35977  
H -0.40746 1.01065 -2.66404  
C 1.58651 1.34864 -1.72006  
H 2.17937 1.27876 -2.64358  
H 1.43009 2.41787 -1.51459  
H 2.17302 0.92029 -0.89741  
H 1.24198 -3.20004 0.47993  
C 0.97364 -2.93797 -2.78053  
C 1.79356 -2.15796 -3.59045  
C 3.12598 -2.53295 -3.74761  
C 3.61648 -3.6684 -3.10772  
C 2.77854 -4.43883 -2.30593



C 1.44416 -4.07692 -2.13342  
H 1.40202 -1.27636 -4.09562  
H 3.77974 -1.93416 -4.37944  
H 4.6581 -3.95626 -3.2374  
H 3.16004 -5.32846 -1.80792  
H 0.78343 -4.67202 -1.50442  
I -1.04573 -2.34262 -2.47188  
C 2.45676 -2.15827 1.94529  
H 3.32075 -2.82679 1.85203  
H 2.63603 -1.27992 1.30932  
H 2.39354 -1.82428 2.98911

### TS-8/12

E(RM06) = -1352.35103873  
Zero-point correction= 0.412244 (Hartree/Particle)  
Thermal correction to Energy= 0.439473  
Thermal correction to Enthalpy= 0.440417  
Thermal correction to Gibbs Free Energy= 0.352637  
Sum of electronic and zero-point Energies= -1351.938795  
Sum of electronic and thermal Energies= -1351.911566  
Sum of electronic and thermal Enthalpies= -1351.910622  
Sum of electronic and thermal Free Energies= -1351.998402  
E(RM06L) = -1353.62738987

C 1.3051 -1.84547 2.08088  
C 2.78158 -0.38039 1.05593  
C 3.8225 -0.83878 1.86037  
C 3.57763 -1.83693 2.79381  
C 2.29175 -2.34347 2.91946  
H 0.28119 -2.20274 2.1579  
H 4.81534 -0.40696 1.77864  
H 4.38304 -2.19898 3.42879  
H 2.0456 -3.10645 3.65271  
C 2.95461 0.73816 0.10592  
C 4.20667 1.25823 -0.21365  
C 1.91594 2.32867 -1.22612  
C 4.29405 2.35 -1.06682  
H 5.11178 0.81574 0.19238  
C 3.12859 2.90603 -1.57486  
H 0.97967 2.739 -1.59668  
H 5.26655 2.76206 -1.32616  
H 3.14716 3.76886 -2.2348  
Pd 0.02688 0.00194 -0.1976  
N 1.82626 1.26858 -0.41649  
N 1.54133 -0.9071 1.15889  
C -1.57203 -1.2416 -0.25405  
C -1.72137 -2.48583 0.36155  
C -2.692 -0.65566 -0.86611  
C -2.9695 -3.0955 0.40452  
H -0.85608 -3.00669 0.769  
C -3.9474 -1.25317 -0.82755  
C -4.07665 -2.47652 -0.18465  
H -3.07905 -4.06753 0.88172  
H -4.7948 -0.75726 -1.29666  
H -5.05037 -2.96138 -0.14846  
C -1.38376 1.19732 -1.11388

H -0.93401 1.72386 -1.96283  
O -2.4999 0.49508 -1.55519  
C -1.64924 2.14364 0.03059  
O -0.85006 3.00252 0.35137  
O -2.80931 1.92264 0.63222  
C -3.12901 2.784 1.7486  
H -2.36235 2.64652 2.52193  
C -0.01134 -1.21776 -1.86048  
C 0.87233 -2.20658 -1.92804  
H -0.60043 -0.8322 -2.69447  
H 1.36584 -2.57324 -1.02435  
C 1.23259 -2.87693 -3.21658  
H 2.30884 -2.78494 -3.41612  
H 1.00607 -3.95121 -3.16655  
H 0.68553 -2.44761 -4.06446  
H -3.08314 3.82506 1.40589  
C -4.50039 2.40058 2.228  
H -4.78466 3.03309 3.07727  
H -5.24546 2.53581 1.43453  
H -4.52574 1.35387 2.5553

#### TS-8/14

E(RM06) = -1352.33064623  
Zero-point correction= 0.413316 (Hartree/Particle)  
Thermal correction to Energy= 0.440134  
Thermal correction to Enthalpy= 0.441078  
Thermal correction to Gibbs Free Energy= 0.355680  
Sum of electronic and zero-point Energies= -1351.917330  
Sum of electronic and thermal Energies= -1351.890513  
Sum of electronic and thermal Enthalpies= -1351.889568  
Sum of electronic and thermal Free Energies= -1351.974966  
E(RM06L) = -1353.60483575

C -3.78771 -3.32296 -0.24037  
C -2.53221 -1.37113 -0.29733  
C -3.67595 -0.62167 -0.55943  
C -4.90258 -1.2609 -0.67412  
C -4.96634 -2.63387 -0.4818  
H -3.80016 -4.39455 -0.06251  
H -3.61673 0.46061 -0.63544  
H -5.80217 -0.6844 -0.87696  
H -5.90851 -3.17373 -0.51013  
C -1.23475 -0.74124 0.00284  
C -0.95937 0.59258 -0.28285  
C 0.81995 -0.98754 1.04614  
C 0.24731 1.13973 0.13468  
H -1.67341 1.19954 -0.83255  
C 1.14726 0.3438 0.8287  
H 1.51592 -1.65534 1.54775  
H 0.47679 2.18099 -0.08021  
H 2.09684 0.73269 1.18553  
Pd -0.73578 -3.68162 0.32398  
N -0.33583 -1.52302 0.64346  
N -2.59276 -2.72074 -0.1949  
C -1.02572 -5.51849 -0.46897  
C -2.06802 -5.89401 -1.31232

C 0.0438 -6.41549 -0.32239  
C -2.09188 -7.15728 -1.90616  
H -2.8786 -5.2069 -1.5411  
C 0.03247 -7.68001 -0.89934  
C -1.05217 -8.05459 -1.68257  
H -2.9283 -7.43074 -2.54704  
H 0.88813 -8.33692 -0.75184  
H -1.06942 -9.04126 -2.14176  
C 1.26989 -4.6874 0.58285  
H 2.03546 -4.5059 1.33952  
O 1.14956 -6.048 0.38849  
C 1.75512 -3.92094 -0.6567  
O 2.26021 -2.82156 -0.58411  
O 1.64975 -4.63878 -1.76315  
C 2.13135 -4.03464 -2.98468  
H 1.58721 -3.09436 -3.1414  
C -0.03097 -4.53556 2.10084  
C 0.11957 -3.72355 3.14781  
H -0.26534 -5.59604 2.2006  
H 0.43194 -2.68611 3.02118  
C -0.13223 -4.17739 4.54787  
H 0.77543 -4.06128 5.15729  
H -0.91166 -3.56416 5.02042  
H -0.44516 -5.22745 4.58695  
H 3.19541 -3.79841 -2.85989  
C 1.88595 -5.03 -4.08346  
H 2.21703 -4.6156 -5.04285  
H 2.4381 -5.95985 -3.90012  
H 0.81776 -5.27099 -4.16001

### TS-12/13

E(RM06) = -1352.40741872  
Zero-point correction= 0.415076 (Hartree/Particle)  
Thermal correction to Energy= 0.441501  
Thermal correction to Enthalpy= 0.442445  
Thermal correction to Gibbs Free Energy= 0.357724  
Sum of electronic and zero-point Energies= -1351.992343  
Sum of electronic and thermal Energies= -1351.965918  
Sum of electronic and thermal Enthalpies= -1351.964974  
Sum of electronic and thermal Free Energies= -1352.049695  
E(RM06L) = -1353.67514115

C 1.05181 -2.37477 1.49392  
C 2.56063 -0.65421 1.10162  
C 3.43977 -1.17946 2.04566  
C 3.09562 -2.34253 2.72102  
C 1.88034 -2.95458 2.44384  
H 0.08339 -2.80877 1.2489  
H 4.37793 -0.67969 2.26894  
H 3.7709 -2.76004 3.46434  
H 1.56862 -3.8616 2.95435  
C 2.8382 0.58029 0.34705  
C 4.10331 1.15853 0.30738  
C 2.0112 2.22953 -1.07252  
C 4.31316 2.30408 -0.448  
H 4.93043 0.7061 0.84704

C 3.25035 2.84841 -1.15271  
H 1.15059 2.64303 -1.58758  
H 5.30063 2.75795 -0.48866  
H 3.364 3.73999 -1.76299  
Pd 0.06926 -0.09168 -0.43739  
N 1.8016 1.12897 -0.33786  
N 1.38322 -1.25953 0.83576  
C -1.87859 -1.5668 -0.89856  
C -2.12699 -2.68662 -0.07489  
C -2.70578 -0.43559 -0.72033  
C -3.14835 -2.67333 0.85677  
H -1.53466 -3.59012 -0.21953  
C -3.76117 -0.43468 0.18694  
C -3.97983 -1.55229 0.97645  
H -3.32949 -3.55156 1.4733  
H -4.37492 0.45904 0.27284  
H -4.7985 -1.55573 1.69344  
C -1.22813 1.26386 -1.28753  
H -0.8424 1.63673 -2.24385  
O -2.4874 0.66945 -1.50666  
C -1.29177 2.37076 -0.27199  
O -0.62798 3.38557 -0.35739  
O -2.1427 2.11636 0.71956  
C -2.25611 3.12122 1.74688  
H -1.27257 3.2491 2.21753  
C -0.93839 -1.59955 -2.04224  
C 0.14621 -2.39791 -2.15622  
H -1.20504 -0.96672 -2.89255  
H 0.42663 -3.04953 -1.32402  
C 1.00084 -2.4645 -3.36915  
H 2.04861 -2.23664 -3.12463  
H 0.99815 -3.47842 -3.79512  
H 0.66258 -1.76383 -4.14253  
H -2.53246 4.07402 1.27795  
C -3.29632 2.64339 2.72132  
H -3.39254 3.36142 3.54434  
H -4.2756 2.54656 2.23613  
H -3.01961 1.66921 3.14452

#### TS-13/15

E(RM06) = -1352.38612493  
Zero-point correction= 0.415555 (Hartree/Particle)  
Thermal correction to Energy= 0.441483  
Thermal correction to Enthalpy= 0.442427  
Thermal correction to Gibbs Free Energy= 0.359191  
Sum of electronic and zero-point Energies= -1351.970570  
Sum of electronic and thermal Energies= -1351.944642  
Sum of electronic and thermal Enthalpies= -1351.943698  
Sum of electronic and thermal Free Energies= -1352.026934  
E(RM06L) = -1353.65034865

C -2.07556 2.65339 0.57909  
C -3.31383 0.70485 0.30346  
C -4.44128 1.32978 0.83149  
C -4.36678 2.65612 1.23285  
C -3.16109 3.3328 1.11028

H -1.11111 3.14527 0.47535  
H -5.3714 0.78128 0.94787  
H -5.24286 3.14996 1.64689  
H -3.05031 4.36757 1.42225  
C -3.31364 -0.71404 -0.10776  
C -4.48442 -1.4614 -0.21398  
C -2.04047 -2.54877 -0.72108  
C -4.40667 -2.79744 -0.58501  
H -5.45359 -1.01023 -0.02186  
C -3.1629 -3.35715 -0.83938  
H -1.04593 -2.95426 -0.89425  
H -5.31335 -3.39185 -0.67356  
H -3.05277 -4.39919 -1.12683  
Pd -0.48049 0.24762 -0.50561  
N -2.10775 -1.2626 -0.36895  
N -2.14779 1.37863 0.17521  
C 3.05003 0.61118 -0.8426  
C 3.88144 1.68252 -0.55641  
C 3.54697 -0.68042 -0.76564  
C 5.20843 1.4274 -0.19404  
H 3.51231 2.70498 -0.63291  
C 4.85186 -0.96585 -0.42402  
C 5.68482 0.1214 -0.13662  
H 5.87215 2.25789 0.03785  
H 5.20374 -1.99339 -0.36675  
H 6.71925 -0.0641 0.14712  
C 1.29499 -1.24188 -0.73359  
H 0.64318 -1.82817 -1.38797  
O 2.61053 -1.63117 -1.06999  
C 1.08914 -1.58559 0.73353  
O 0.44325 -2.5403 1.10897  
O 1.77533 -0.7702 1.52679  
C 1.7949 -1.08461 2.93706  
H 0.76986 -1.01385 3.32267  
C 1.65714 0.6584 -1.35624  
C 0.80079 1.76169 -0.99232  
H 1.59257 0.38136 -2.41773  
H 1.09466 2.303 -0.08316  
C 0.21822 2.60503 -2.09061  
H -0.62496 3.21648 -1.74627  
H 0.98569 3.29903 -2.4703  
H -0.1168 1.98978 -2.93662  
H 2.13465 -2.12091 3.0556  
C 2.72508 -0.09841 3.58582  
H 2.80161 -0.30622 4.65943  
H 3.72875 -0.16632 3.14685  
H 2.3602 0.92865 3.45876

#### TS-15/16

E(RM06) = -1352.43225054  
Zero-point correction= 0.416768 (Hartree/Particle)  
Thermal correction to Energy= 0.442419  
Thermal correction to Enthalpy= 0.443363  
Thermal correction to Gibbs Free Energy= 0.360089  
Sum of electronic and zero-point Energies= -1352.015483  
Sum of electronic and thermal Energies= -1351.989831

Sum of electronic and thermal Enthalpies= -1351.988887  
Sum of electronic and thermal Free Energies= -1352.072161  
E(RM06L) = -1353.69204947

C -3.32426 -2.26623 1.52869  
C -2.95382 -1.30755 -0.55655  
C -3.83671 -0.27345 -0.25351  
C -4.46647 -0.24695 0.98317  
C -4.20933 -1.26235 1.89379  
H -3.10061 -3.08711 2.20761  
H -4.04591 0.50342 -0.98376  
H -5.15776 0.55676 1.22594  
H -4.68422 -1.28879 2.87069  
C -2.27095 -1.40592 -1.86485  
C -2.27807 -0.37944 -2.80714  
C -0.99365 -2.74199 -3.27207  
C -1.62135 -0.56709 -4.01708  
H -2.77493 0.56468 -2.60169  
C -0.97057 -1.76944 -4.2628  
H -0.49237 -3.70246 -3.40104  
H -1.61707 0.22693 -4.76073  
H -0.44731 -1.954 -5.19717  
Pd -1.45428 -3.87571 -0.37388  
N -1.62445 -2.56345 -2.10997  
N -2.70585 -2.29054 0.34339  
C -1.22504 -6.27053 -0.8118  
C -2.54844 -6.18632 -1.25505  
C -0.20065 -6.55206 -1.72152  
C -2.80238 -6.33697 -2.62532  
H -3.36609 -6.04841 -0.54814  
C -0.4322 -6.71449 -3.07354  
C -1.75844 -6.59403 -3.50945  
H -3.82328 -6.26801 -2.99477  
H 0.38001 -6.93948 -3.76105  
H -1.97472 -6.71692 -4.56951  
C 0.88486 -6.19189 0.239  
H 1.4792 -6.84655 0.88192  
O 1.00787 -6.6818 -1.11663  
C 1.52225 -4.81158 0.18222  
O 1.05761 -3.88673 -0.46458  
O 2.6544 -4.75597 0.85348  
C 3.36289 -3.4899 0.84023  
H 3.5623 -3.22087 -0.20404  
C -0.62736 -6.22463 0.58838  
C -1.24905 -5.03049 1.29568  
H -0.82705 -7.16083 1.1376  
H -2.27953 -5.28998 1.58549  
C -0.51286 -4.40817 2.45216  
H -1.05722 -3.54793 2.86292  
H -0.40759 -5.14254 3.26869  
H 0.49824 -4.05806 2.20665  
H 2.70068 -2.72738 1.27124  
C 4.62199 -3.67608 1.63724  
H 5.18864 -2.73782 1.65154  
H 4.39616 -3.95678 2.67304  
H 5.25606 -4.45324 1.19383

**TS-16/17**

E(RM06) = -1352.41675525  
Zero-point correction= 0.416449 (Hartree/Particle)  
Thermal correction to Energy= 0.442268  
Thermal correction to Enthalpy= 0.443212  
Thermal correction to Gibbs Free Energy= 0.358057  
Sum of electronic and zero-point Energies= -1352.000306  
Sum of electronic and thermal Energies= -1351.974488  
Sum of electronic and thermal Enthalpies= -1351.973544  
Sum of electronic and thermal Free Energies= -1352.058698  
E(RM06L) = -1353.67965284

C -0.96938 -1.09512 0.85873  
C -3.05707 -1.02018 -0.17394  
C -3.33506 0.18971 0.45753  
C -2.39385 0.76132 1.30269  
C -1.18668 0.10993 1.50893  
H -0.0377 -1.63846 0.99828  
H -4.28787 0.68699 0.30178  
H -2.60868 1.70583 1.79716  
H -0.41973 0.51546 2.1629  
C -4.02407 -1.68229 -1.07832  
C -5.22029 -1.08792 -1.47394  
C -4.51819 -3.5838 -2.3163  
C -6.08057 -1.78627 -2.31209  
H -5.48417 -0.08648 -1.14674  
C -5.73219 -3.06026 -2.73988  
H -4.19012 -4.57521 -2.62777  
H -7.01677 -1.33162 -2.62808  
H -6.37889 -3.63991 -3.39283  
Pd -1.66079 -3.50535 -0.9366  
N -3.68851 -2.91463 -1.51261  
N -1.87199 -1.64606 0.03956  
C 0.33511 -5.75159 -2.13477  
C -0.48686 -5.50162 -3.22278  
C 1.60456 -6.28416 -2.33348  
C -0.02772 -5.81109 -4.50535  
H -1.48418 -5.07046 -3.07734  
C 2.08836 -6.59852 -3.59262  
C 1.24589 -6.3526 -4.6787  
H -0.66443 -5.63274 -5.36953  
H 3.08353 -7.01841 -3.72129  
H 1.59324 -6.59394 -5.68195  
C 1.38137 -6.26415 -0.10506  
H 1.00439 -7.25244 0.19828  
O 2.30526 -6.43363 -1.17445  
C 2.06455 -5.60816 1.06989  
O 3.11699 -5.01847 1.03225  
O 1.29773 -5.74353 2.15242  
C 1.75303 -5.05673 3.33836  
H 2.72967 -5.46703 3.62374  
C 0.18218 -5.42625 -0.67264  
C 0.23363 -3.93187 -0.37226  
H -0.74477 -5.84111 -0.23483  
H 0.27411 -3.75221 0.71445

C 1.23375 -3.1076 -1.13567  
H 1.15701 -2.04205 -0.88194  
H 2.26227 -3.42346 -0.88764  
H 1.11502 -3.20983 -2.22251  
H 1.89293 -3.99568 3.08996  
C 0.71411 -5.25977 4.40477  
H 1.02574 -4.7533 5.3259  
H -0.25369 -4.84491 4.09582  
H 0.58114 -6.32542 4.62748

### TS-17/18

E(RM06) = -1352.41404633  
Zero-point correction= 0.413367 (Hartree/Particle)  
Thermal correction to Energy= 0.439411  
Thermal correction to Enthalpy= 0.440355  
Thermal correction to Gibbs Free Energy= 0.356841  
Sum of electronic and zero-point Energies= -1352.000680  
Sum of electronic and thermal Energies= -1351.974636  
Sum of electronic and thermal Enthalpies= -1351.973692  
Sum of electronic and thermal Free Energies= -1352.057205  
E(RM06L) = -1353.67974385

C -1.43966 -1.61531 1.45922  
C -3.33253 -1.51168 0.11596  
C -4.00976 -0.78719 1.0937  
C -3.36334 -0.47607 2.28314  
C -2.05166 -0.88883 2.47099  
H -0.41225 -1.95903 1.5666  
H -5.0384 -0.47369 0.94081  
H -3.8849 0.08573 3.05465  
H -1.50524 -0.66097 3.38203  
C -3.94623 -1.88023 -1.17716  
C -5.19236 -1.41144 -1.5828  
C -3.71964 -3.07983 -3.16063  
C -5.70237 -1.80258 -2.81395  
H -5.7629 -0.73623 -0.95178  
C -4.95727 -2.65296 -3.6189  
H -3.09482 -3.74322 -3.75288  
H -6.67476 -1.44002 -3.13918  
H -5.31792 -2.98396 -4.58877  
Pd -1.33372 -3.27601 -1.21363  
N -3.22587 -2.70401 -1.97362  
N -2.06064 -1.92643 0.31686  
C 1.26351 -5.11548 -2.39374  
C 1.83884 -4.41104 -3.44346  
C 1.57289 -6.46283 -2.20512  
C 2.73283 -5.07591 -4.28189  
H 1.58232 -3.36789 -3.62388  
C 2.46713 -7.1385 -3.01797  
C 3.04662 -6.41822 -4.06186  
H 3.18649 -4.54424 -5.11571  
H 2.69344 -8.18828 -2.8454  
H 3.7485 -6.9207 -4.72521  
C -0.09305 -6.11188 -0.74708  
H -1.03672 -6.40022 -1.23309  
O 0.92208 -7.02711 -1.14786



C -0.26708 -6.13532 0.75474  
O 0.57876 -6.45187 1.55317  
O -1.482 -5.67543 1.05305  
C -1.75434 -5.40791 2.44549  
H -1.65112 -6.34319 3.00912  
C 0.37908 -4.73693 -1.26176  
C 0.58907 -3.63949 -0.39766  
H -0.94788 -4.27835 -2.3657  
H 0.39801 -3.80996 0.6668  
C 1.53048 -2.51576 -0.70212  
H 1.31938 -1.65073 -0.06101  
H 2.56747 -2.83086 -0.50387  
H 1.47555 -2.18419 -1.7444  
H -0.99491 -4.70403 2.81544  
C -3.14323 -4.83868 2.52398  
H -3.38084 -4.5766 3.56181  
H -3.22949 -3.93103 1.90954  
H -3.88663 -5.56495 2.17323

### TS-19/20

E(RM06) = -1352.41313209  
Zero-point correction= 0.414365 (Hartree/Particle)  
Thermal correction to Energy= 0.440303  
Thermal correction to Enthalpy= 0.441248  
Thermal correction to Gibbs Free Energy= 0.355792  
Sum of electronic and zero-point Energies= -1351.998768  
Sum of electronic and thermal Energies= -1351.972829  
Sum of electronic and thermal Enthalpies= -1351.971885  
Sum of electronic and thermal Free Energies= -1352.057340  
E(RM06L) = -1353.67949770

C -1.9477 -0.55285 0.66813  
C -3.24602 -0.61303 -1.2445  
C -3.56589 0.73413 -1.09302  
C -3.0428 1.44682 -0.02274  
C -2.21964 0.7919 0.88014  
H -1.31352 -1.09744 1.35972  
H -4.23343 1.22914 -1.79179  
H -3.28774 2.49885 0.10442  
H -1.79359 1.30028 1.7407  
C -3.80399 -1.42724 -2.34271  
C -4.53144 -0.87605 -3.39508  
C -4.09974 -3.56149 -3.2266  
C -5.05734 -1.70589 -4.37525  
H -4.68169 0.19723 -3.46199  
C -4.84664 -3.07468 -4.28773  
H -3.89729 -4.62334 -3.12368  
H -5.62564 -1.28142 -5.19963  
H -5.2425 -3.76402 -5.02829  
Pd -2.25153 -3.43561 -0.79241  
N -3.58729 -2.76089 -2.27917  
N -2.43257 -1.24593 -0.36631  
C 0.43707 -4.68326 -1.42676  
C 1.27341 -3.62135 -1.78408  
C 0.3458 -5.80246 -2.26722  
C 2.00469 -3.71753 -2.96091

H 1.35711 -2.73684 -1.15562  
C 1.0594 -5.91085 -3.44924  
C 1.89389 -4.84747 -3.78088  
H 2.67321 -2.90869 -3.24786  
H 0.96994 -6.79374 -4.07753  
H 2.47799 -4.89983 -4.698  
C -0.82644 -6.39104 -0.47346  
H -1.84961 -6.68375 -0.222  
O -0.53896 -6.73273 -1.81983  
C 0.14923 -7.14455 0.44127  
O 1.13446 -7.72805 0.06461  
O -0.25679 -7.03672 1.70069  
C 0.59635 -7.63047 2.70632  
H 0.61595 -8.71527 2.54298  
C -0.52523 -4.9015 -0.34971  
C -0.85277 -4.1433 0.77287  
H -2.5307 -4.88322 -1.25668  
H -1.49713 -4.65321 1.49483  
C 0.06739 -3.1102 1.35313  
H -0.37853 -2.63304 2.23228  
H 0.98999 -3.60666 1.69452  
H 0.36531 -2.33015 0.64278  
H 1.6147 -7.24726 2.56538  
C 0.02678 -7.26072 4.0465  
H 0.64591 -7.68877 4.84357  
H 0.00665 -6.17083 4.175  
H -0.99415 -7.64503 4.16107

### TS-22/23

E(RM06) = -1352.42682468  
Zero-point correction= 0.413436 (Hartree/Particle)  
Thermal correction to Energy= 0.439478  
Thermal correction to Enthalpy= 0.440422  
Thermal correction to Gibbs Free Energy= 0.356983  
Sum of electronic and zero-point Energies= -1352.013389  
Sum of electronic and thermal Energies= -1351.987347  
Sum of electronic and thermal Enthalpies= -1351.986403  
Sum of electronic and thermal Free Energies= -1352.069842  
E(RM06L) = -1353.69529527

C 1.79664 3.49719 0.81248  
C 2.93436 2.00651 -0.56839  
C 4.04793 2.84209 -0.57945  
C 4.01769 4.03317 0.13324  
C 2.87394 4.36972 0.84374  
H 0.87665 3.71675 1.34746  
H 4.9371 2.57179 -1.14171  
H 4.88363 4.69125 0.12942  
H 2.80559 5.29182 1.41406  
C 2.88955 0.72141 -1.29592  
C 3.96512 0.24516 -2.04169  
C 1.64504 -1.16085 -1.82908  
C 3.85562 -0.97416 -2.69639  
H 4.88653 0.81526 -2.1134  
C 2.67499 -1.69557 -2.58992  
H 0.70413 -1.69529 -1.71078

H 4.68981 -1.35466 -3.28147  
H 2.54511 -2.65589 -3.08124  
Pd 0.20097 1.00105 0.01095  
N 1.74174 0.01393 -1.20044  
N 1.82486 2.346 0.12692  
C -1.9491 -0.22632 -1.55405  
C -1.8213 -0.983 -2.72258  
C -2.6697 0.97069 -1.5983  
C -2.38808 -0.49014 -3.89087  
H -1.29828 -1.93819 -2.72093  
C -3.23438 1.49003 -2.7499  
C -3.07681 0.7313 -3.90528  
H -2.30185 -1.06308 -4.81198  
H -3.78506 2.42747 -2.73918  
H -3.51154 1.08769 -4.83711  
C -2.02697 0.7509 0.49775  
H -0.74672 1.88209 0.90698  
O -2.75954 1.53458 -0.35903  
C -2.52169 0.86527 1.91098  
O -3.38025 1.64593 2.24242  
O -1.90897 0.00183 2.70614  
C -2.33317 -0.00932 4.09008  
H -3.41306 -0.20003 4.11535  
C -1.49453 -0.40109 -0.17608  
C -1.20584 -1.76748 0.41112  
H -2.0965 -2.06594 0.98602  
H -1.14918 -2.46915 -0.4338  
C 0.03024 -1.94649 1.28354  
H 0.0392 -2.9628 1.69892  
H 0.95625 -1.81485 0.70951  
H 0.04526 -1.24115 2.12138  
H -2.1518 0.98624 4.51407  
C -1.54656 -1.08417 4.78476  
H -1.86289 -1.1528 5.83219  
H -1.71432 -2.05999 4.31069  
H -0.47173 -0.86495 4.76577
